# Supplementary material
Source: MDPI journal article supplement (https://www.mdpi.com/2073-4344/13/2/270)
Supplement: s1 [file s1]

# Supporting Information

## (L)-proline hydrochloride (cationic approach) (1): [ProNH<sub>2</sub>][Cl]

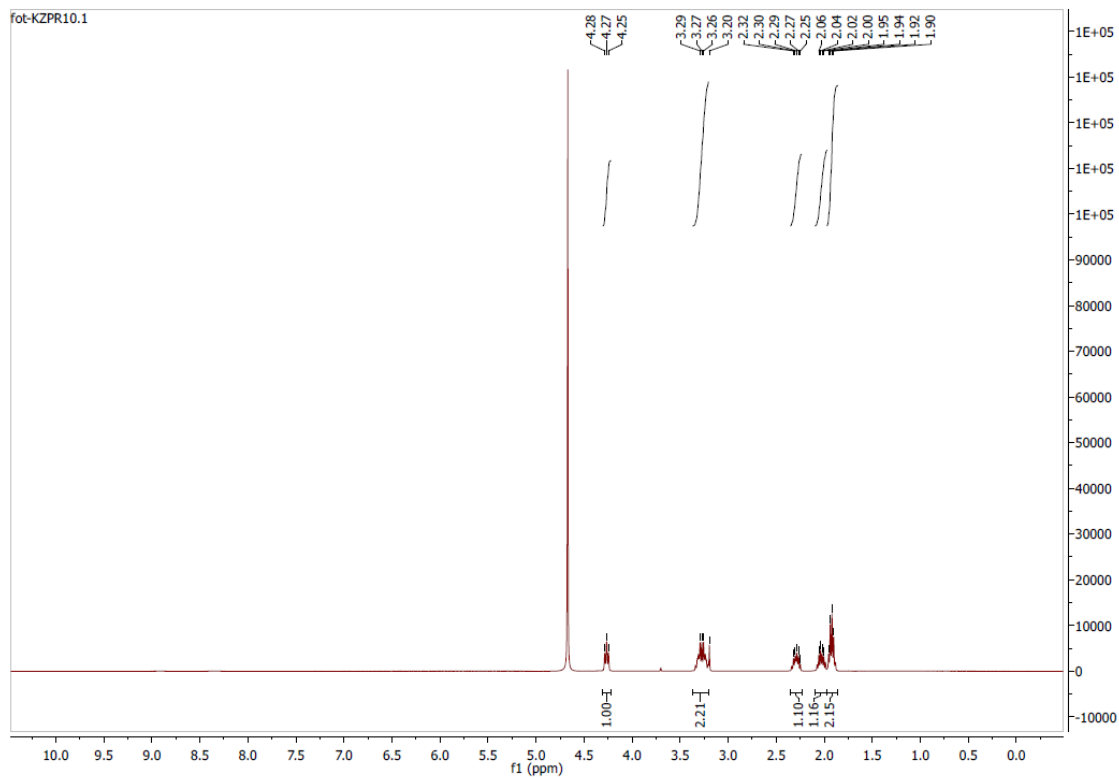

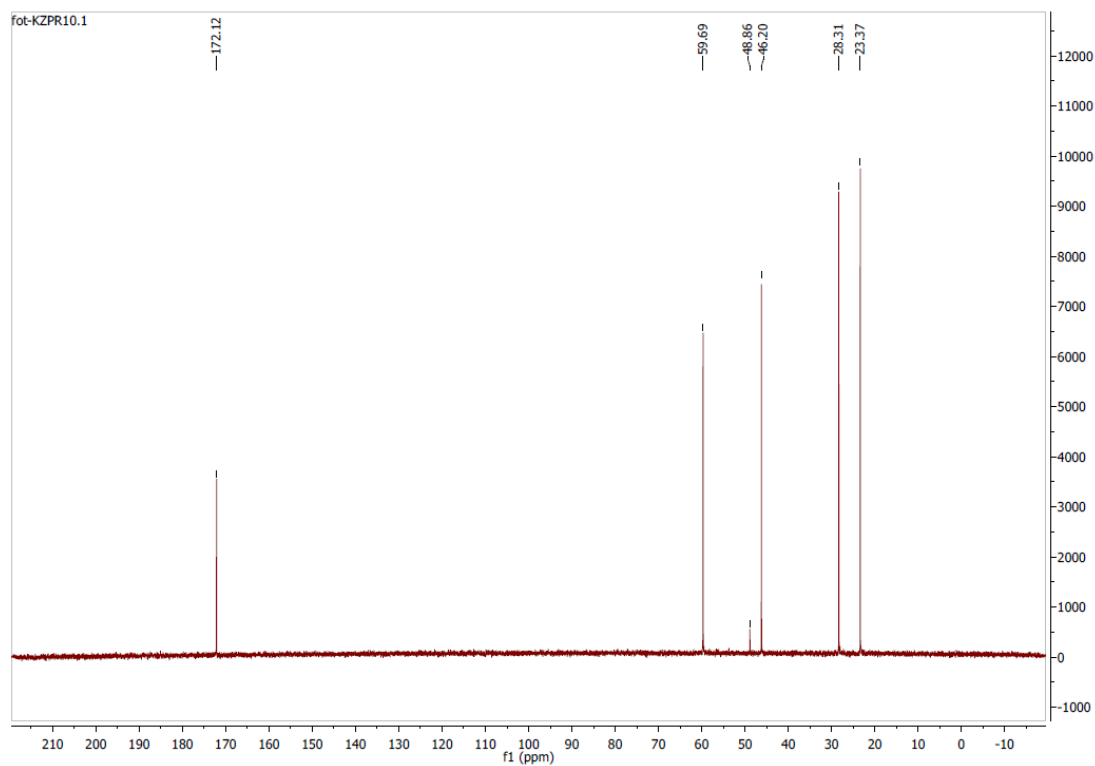

**(L)-2-carboxypyrrolidin-1-ium bis((trifluoromethyl)sulfonyl)amide (1a)**  
**[ProNH<sub>2</sub>][NTf<sub>2</sub>]**

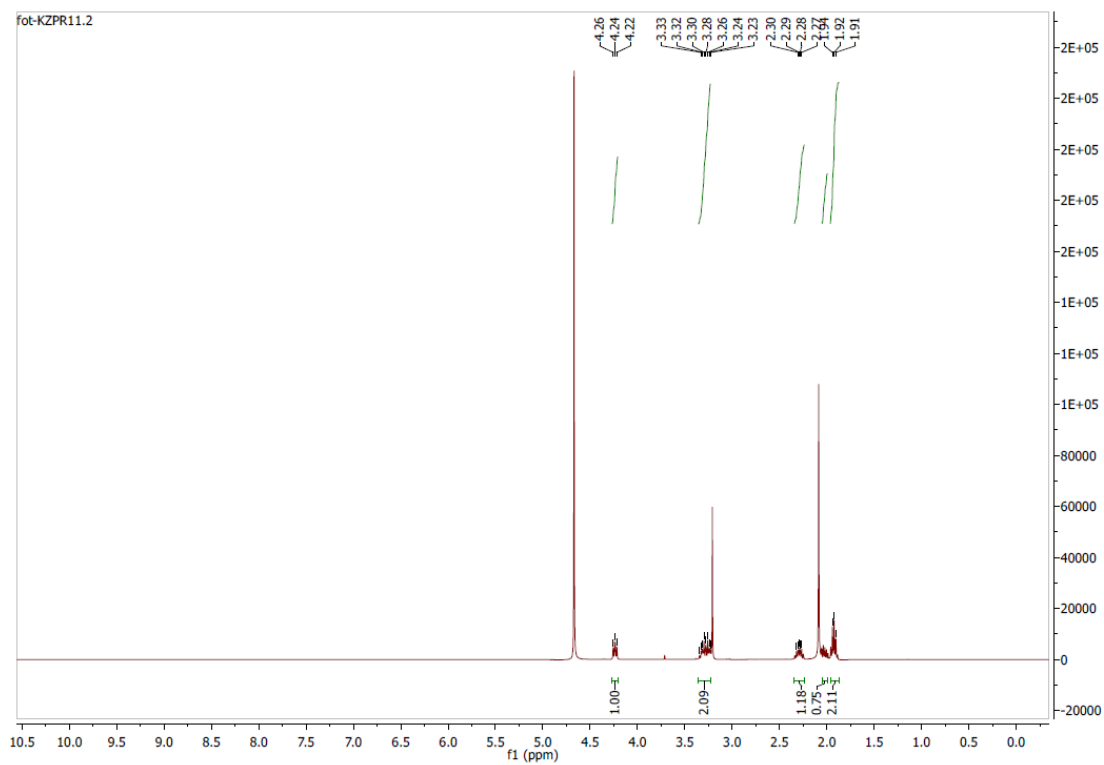

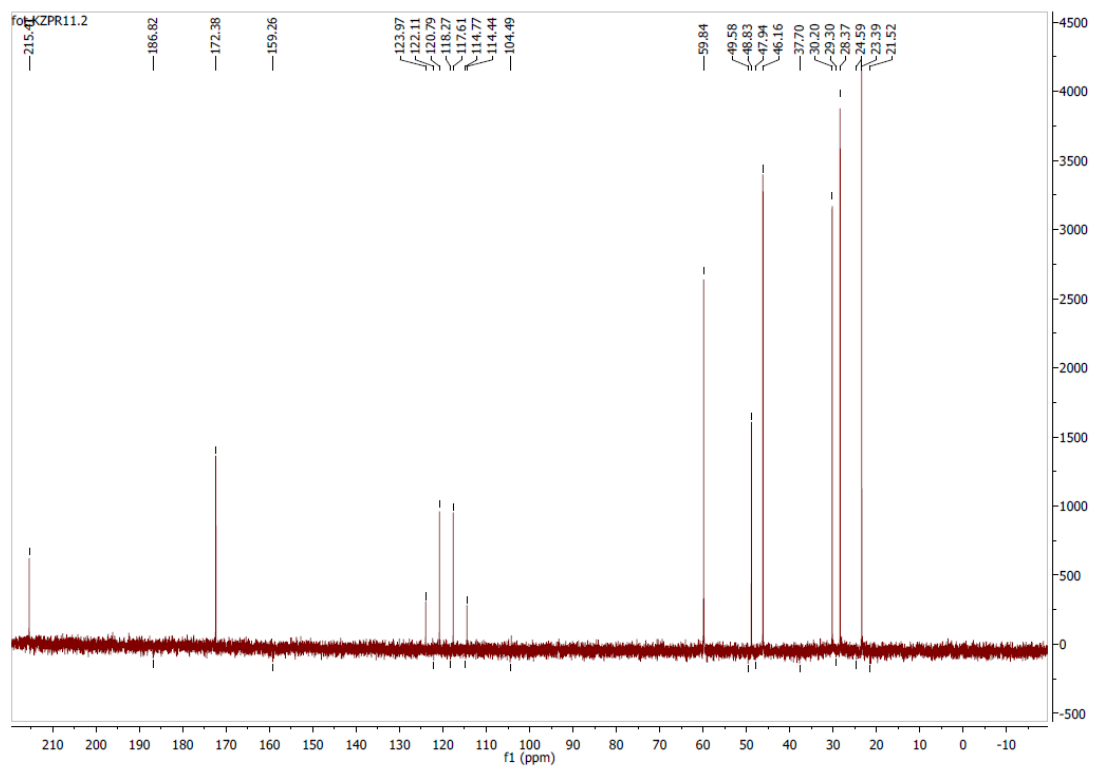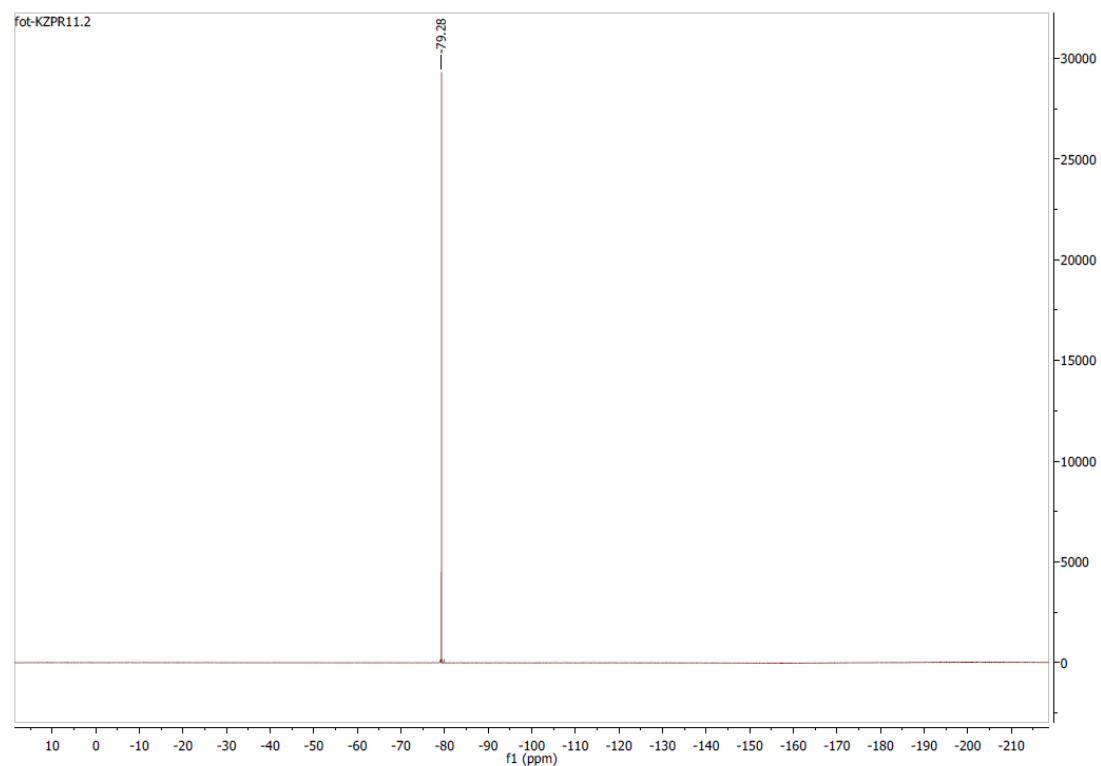

**2-carboxypyrrolidin-1-ium 1,4-bis((2-ethylhexyl)oxy)-1,4-dioxobutane-2-sulfonate (1b) [ProNH<sub>2</sub>][AOT]**

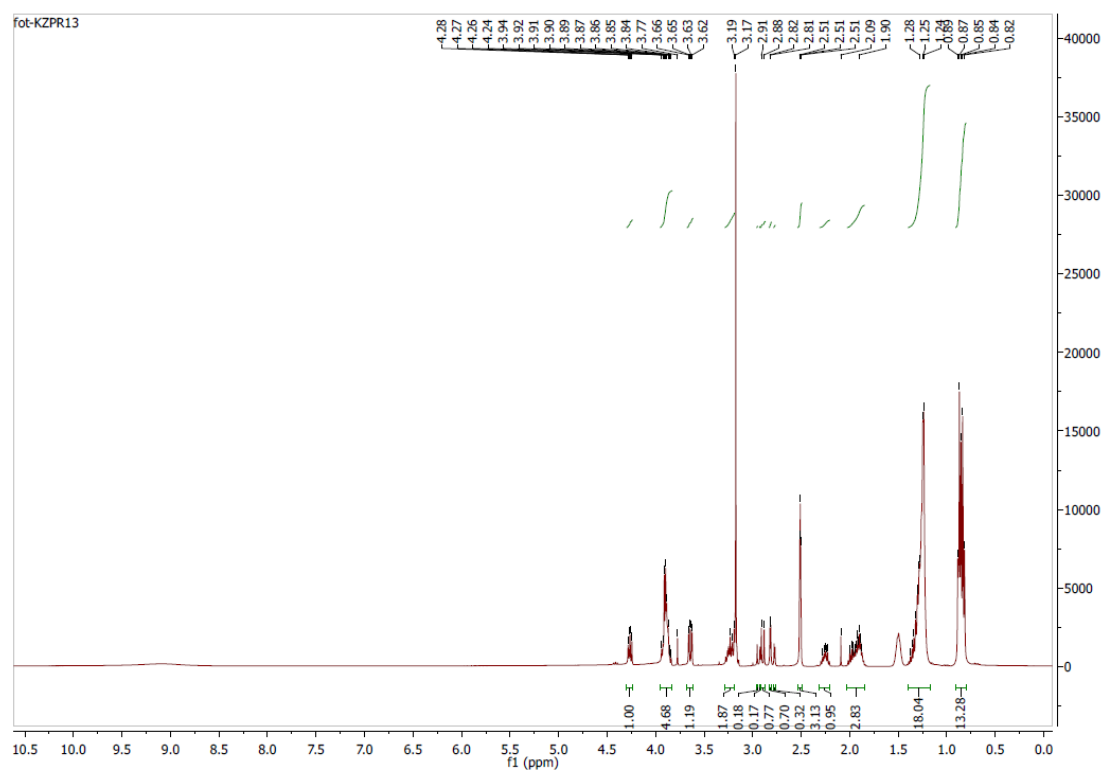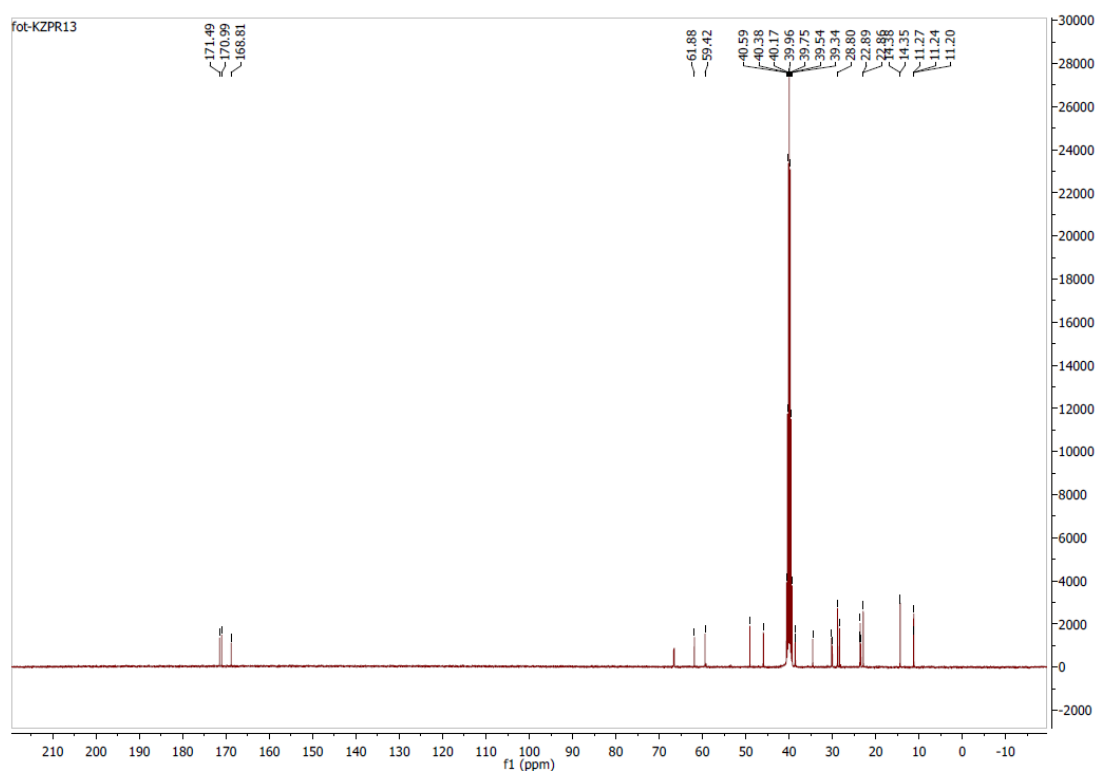

**(S)-2-carboxypyrrolidin-1-ium 4-methylbenzenesulfonate (1c) [ProNH<sub>2</sub>][PTSA]**

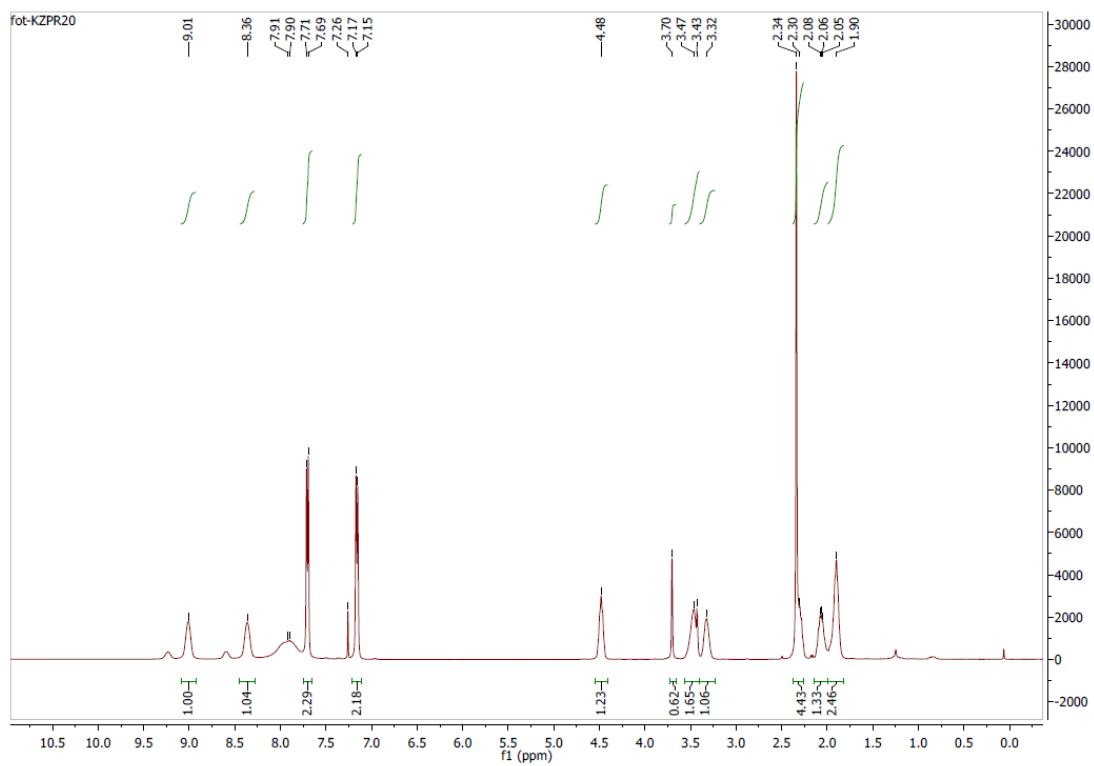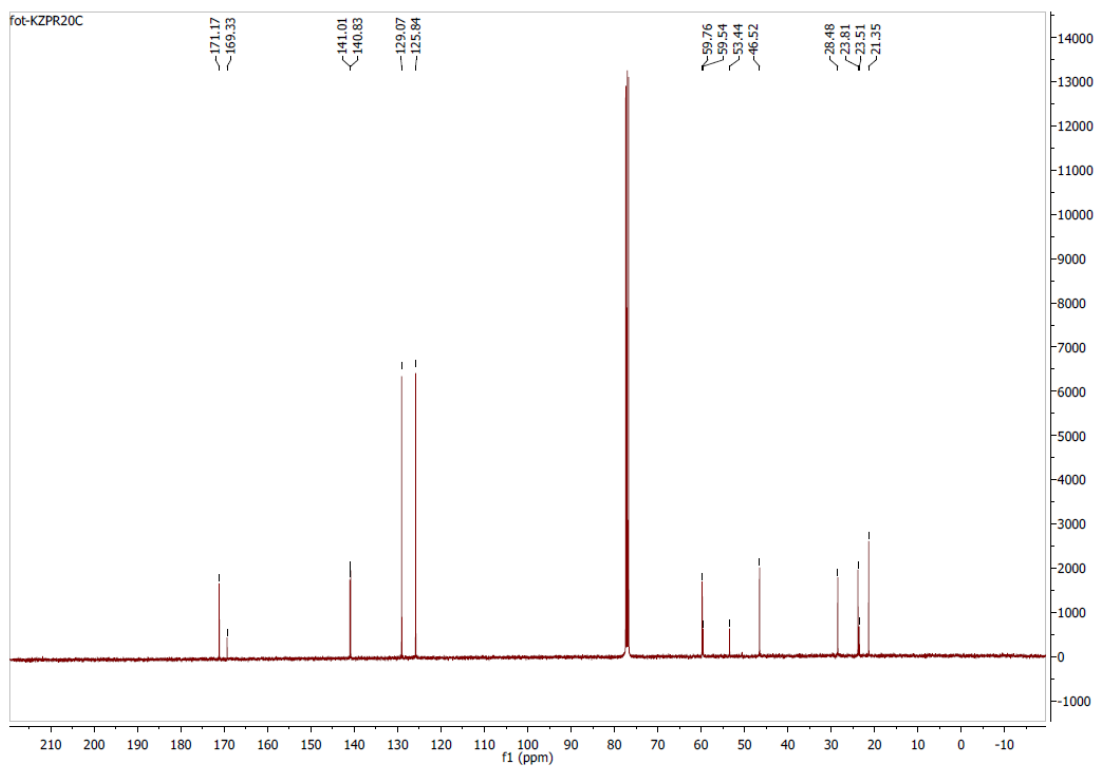

**(R)-2-carboxypyrrolidin-1-ium 3-oxo-3H-benzo[d]isothiazol-2-ide 1,1-dioxide (1d)**

**[ProNH<sub>2</sub>][SAC]**

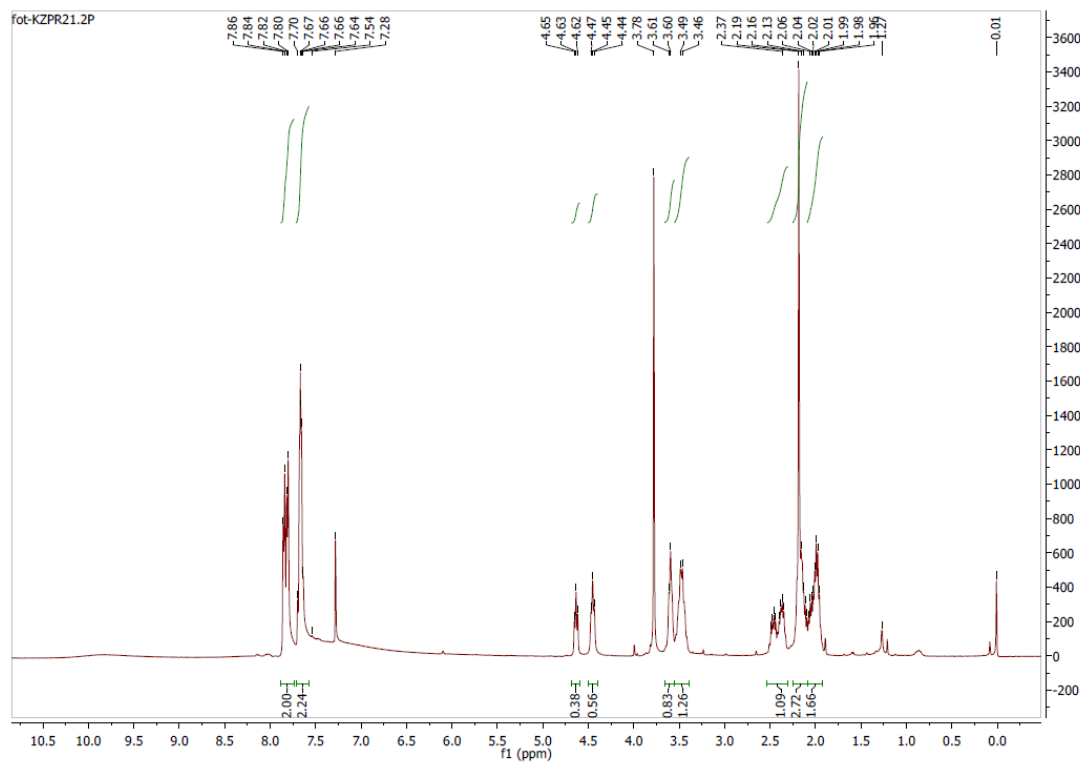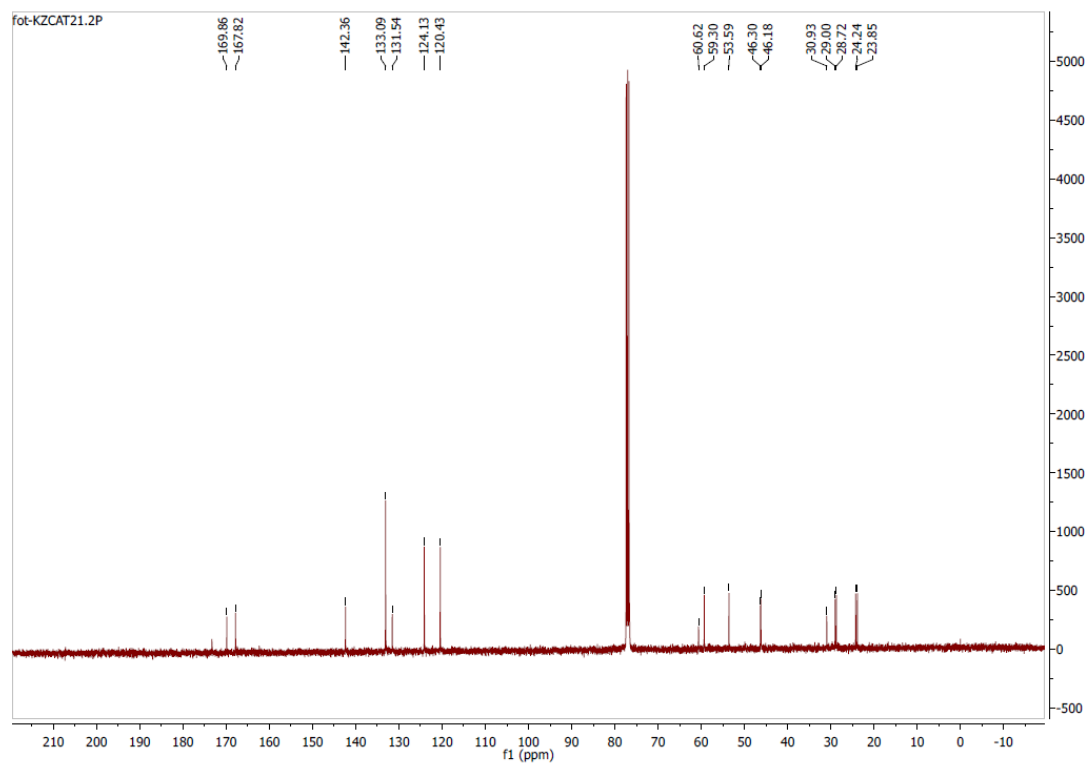

**(L)-2-carboxypyrrolidin-1-ium ((1D, 4D)-7,7-dimethyl-2-oxobicyclo[2.2.1]heptan-1-yl)methanesulfonate (1e)**

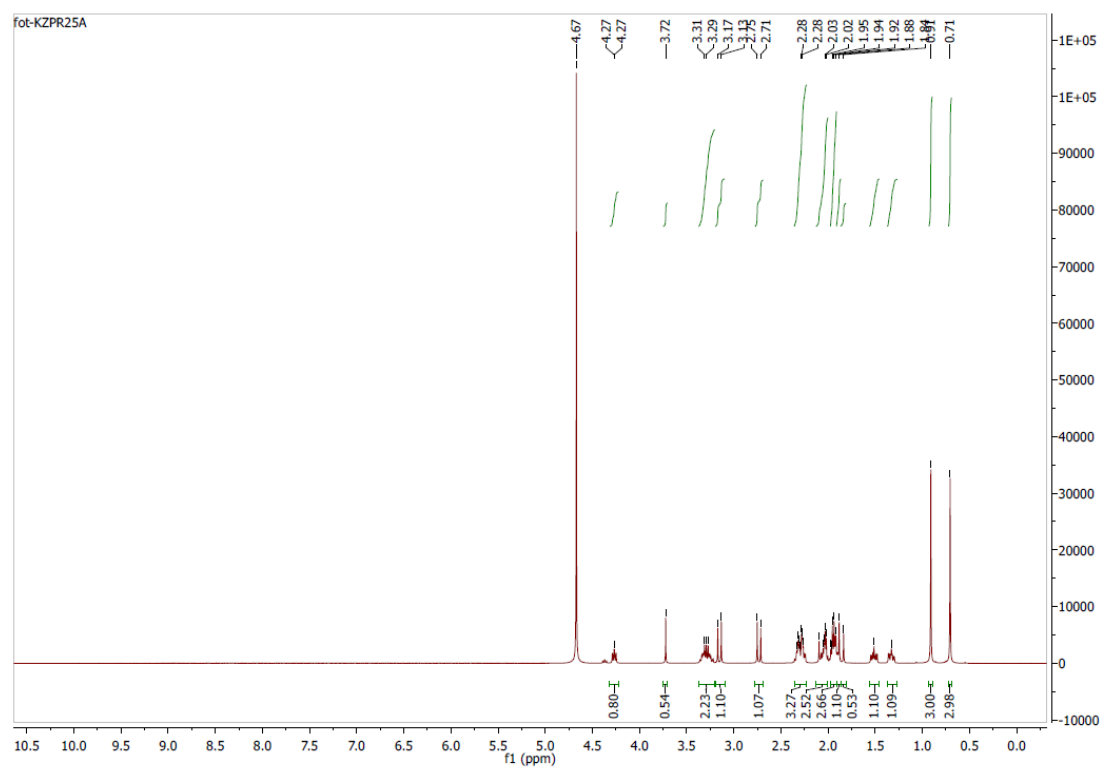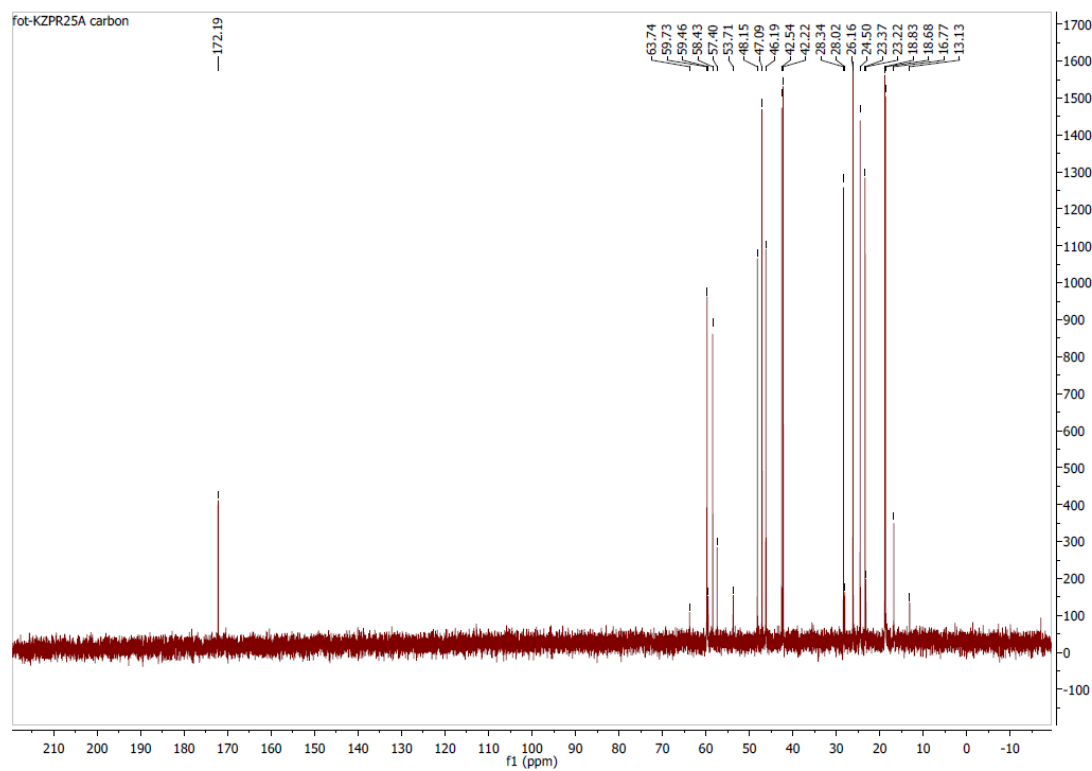

**(L)-2-carboxypyrrolidin-1-ium ((1L, 4D)-7,7-dimethyl-2-oxobicyclo[2.2.1]heptan-1-yl)methanesulfonate (1f)**

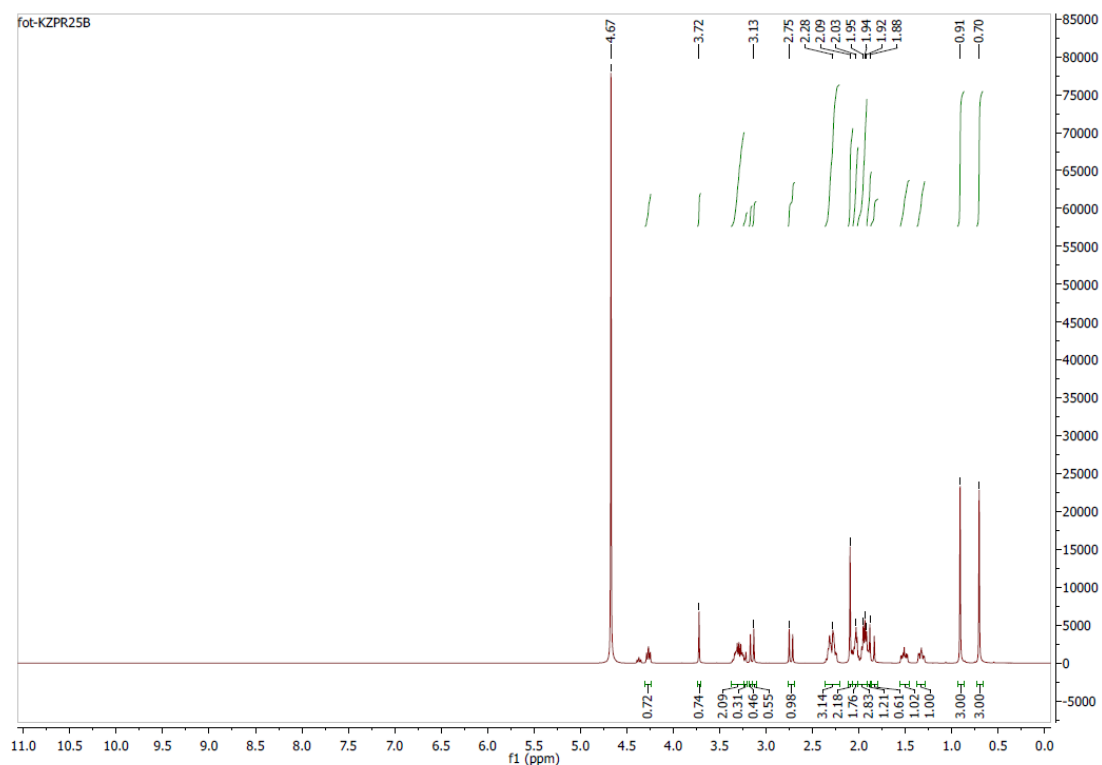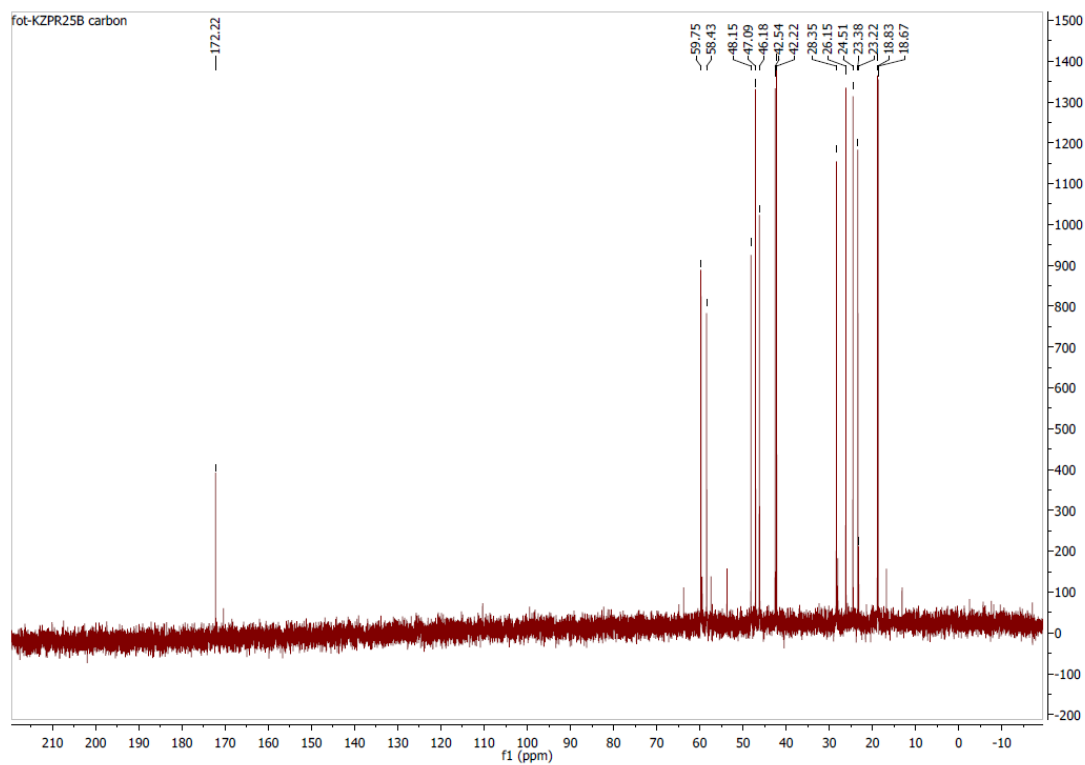



trihexyl(tetradecyl)phosphonium (L)-pyrrolidine-2-carboxylate (2a)

[P<sub>6,6,6,14</sub>][ProCO<sub>2</sub>]

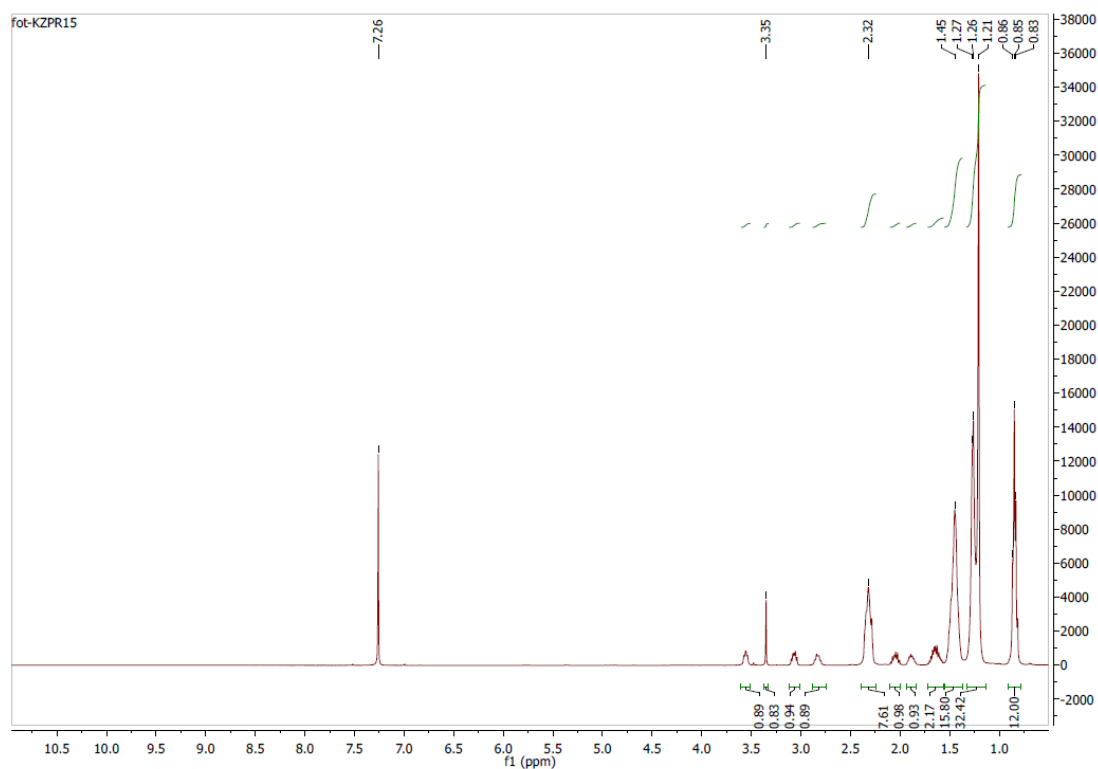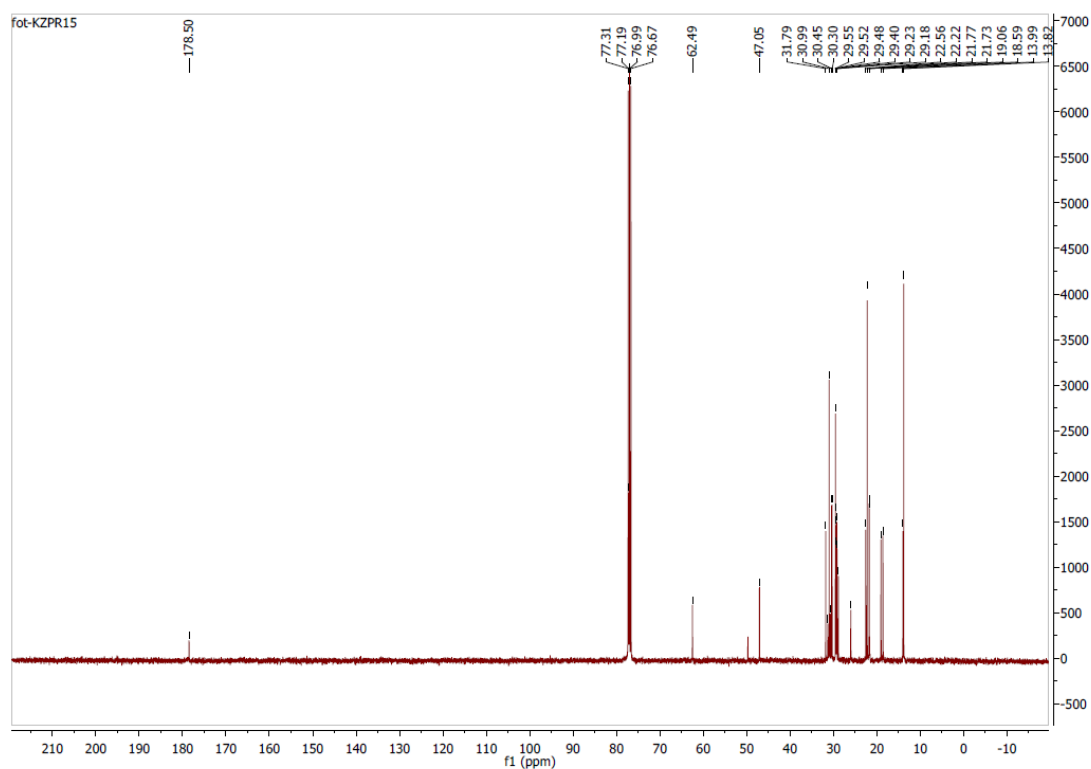

# 1-ethyl-3-methyl-1H-imidazol-3-ium pyrrolidine-2-carboxylate (2b)

[EMIM][ProCO<sub>2</sub>]

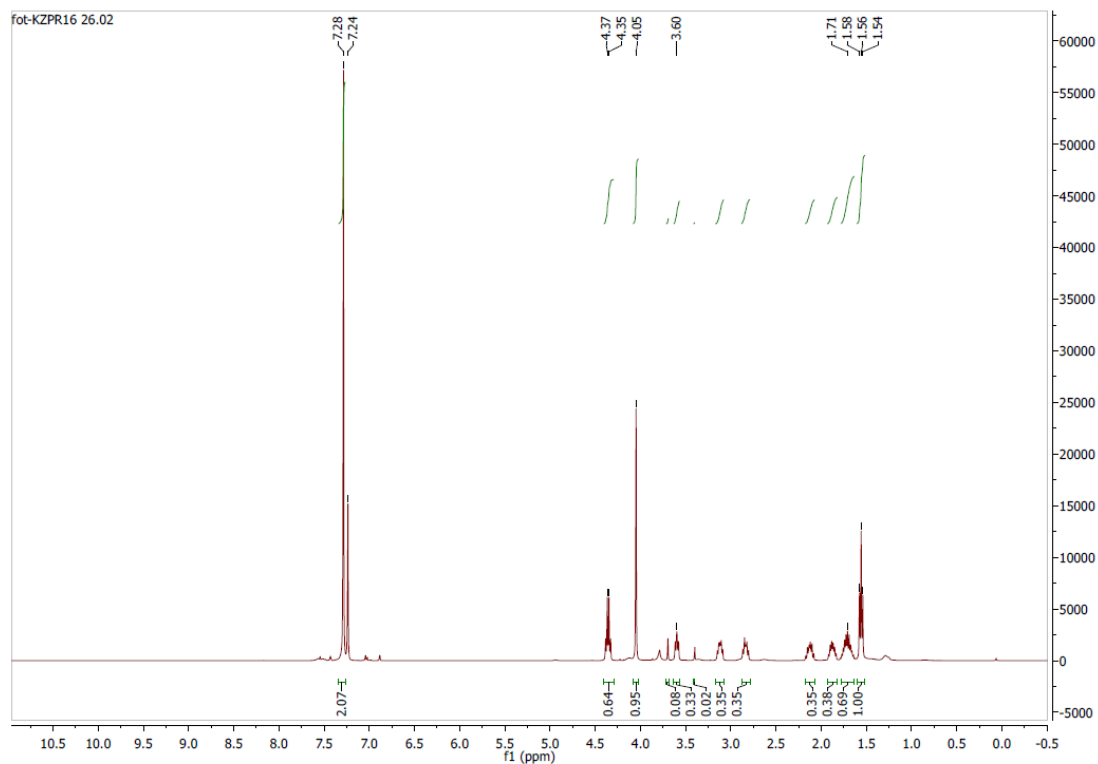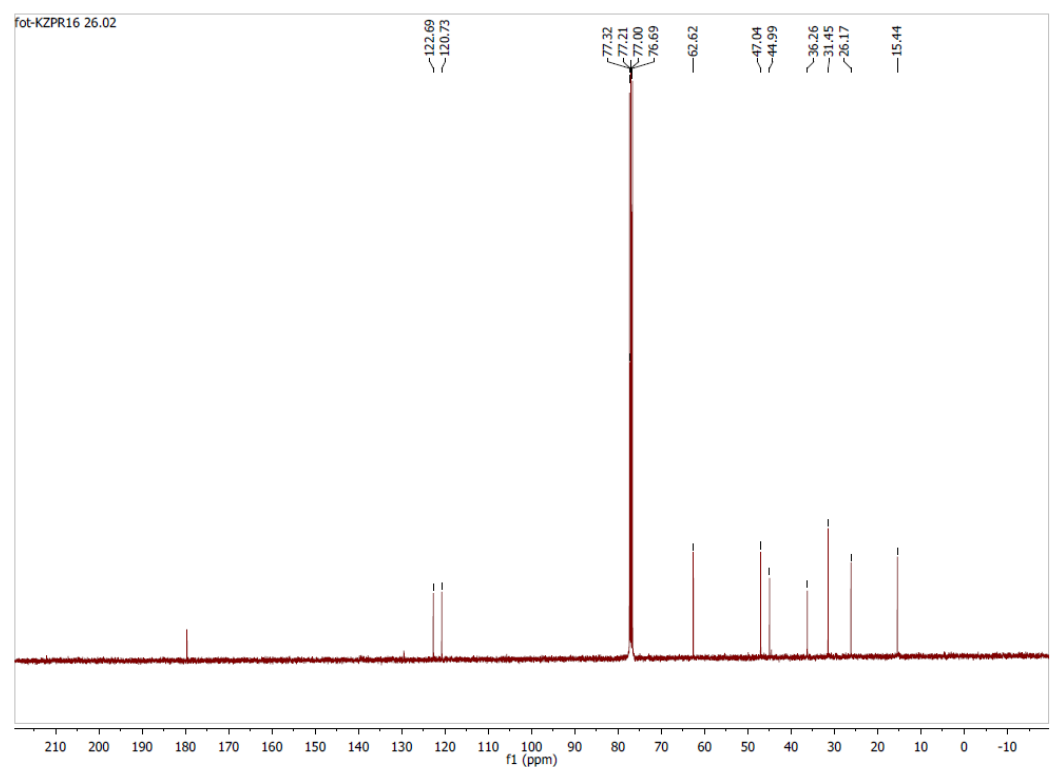

**1-(2-methoxyethyl)-3-methyl-1H-imidazol-3-ium (L)- pyrrolidine-2-carboxylate  
(2c)[C<sub>3</sub>OMIM][ProCO<sub>2</sub>]**

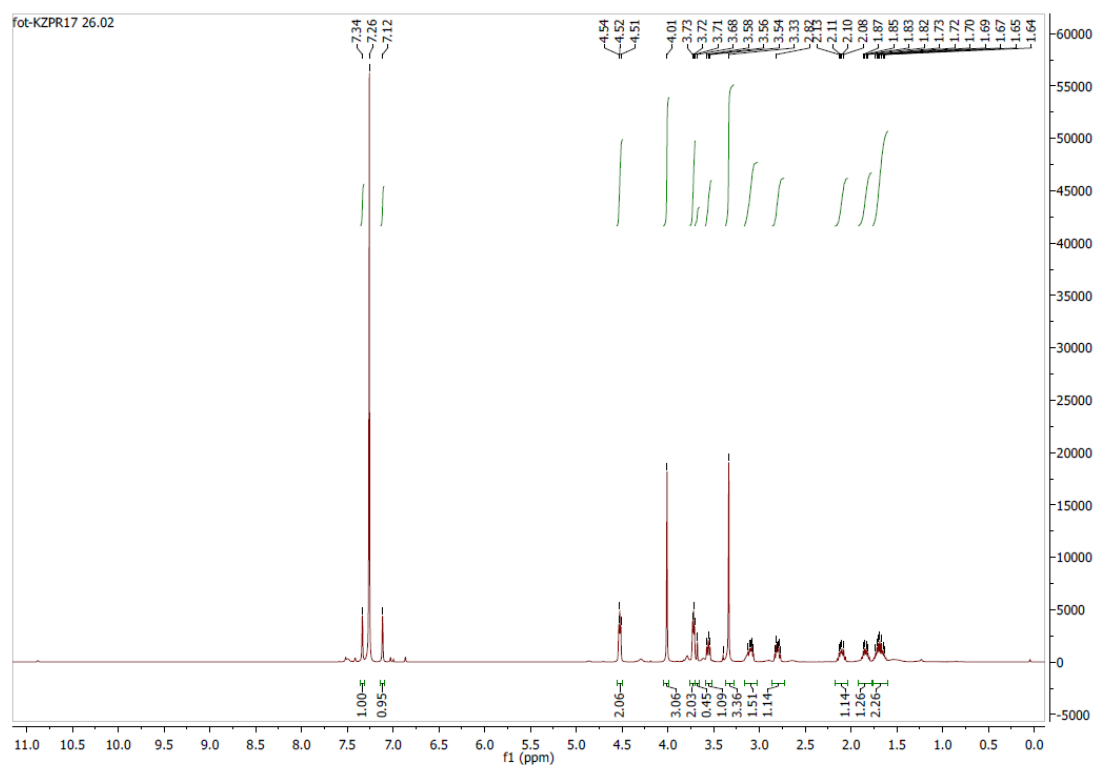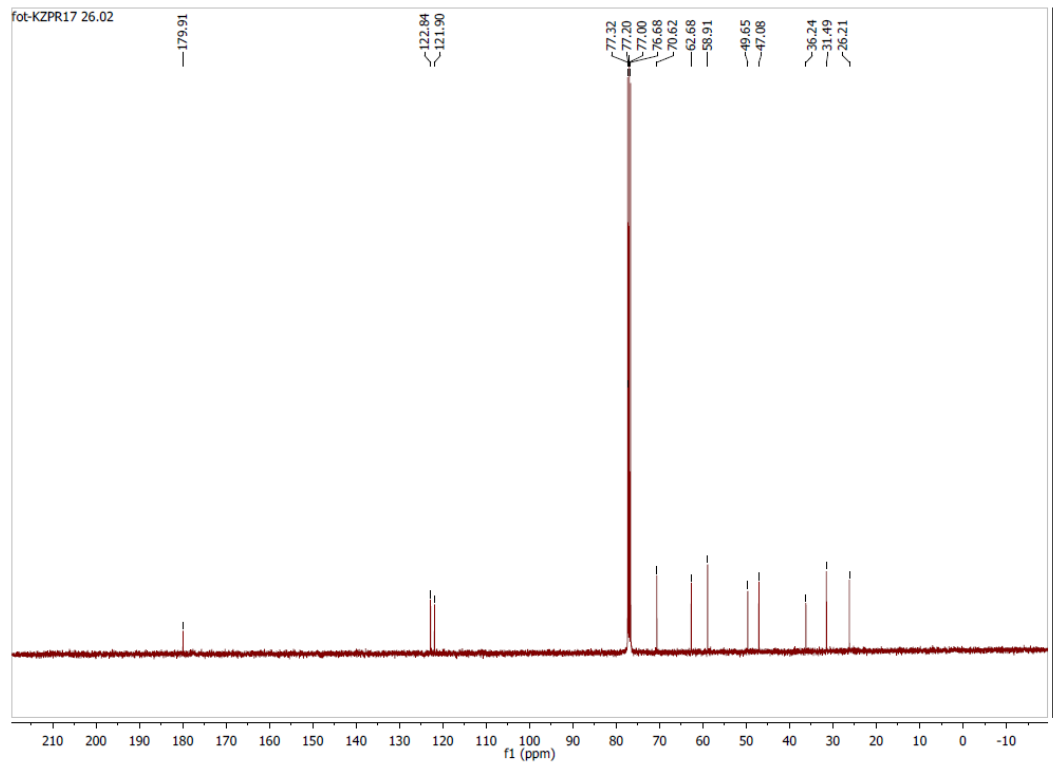

**1-(2-hydroxyethyl)-3-methyl-1H-imidazol-3-ium (L)-pyrrolidine-2-carboxylate  
(2d) [C<sub>2</sub>OHMIM][ProCO<sub>2</sub>]**

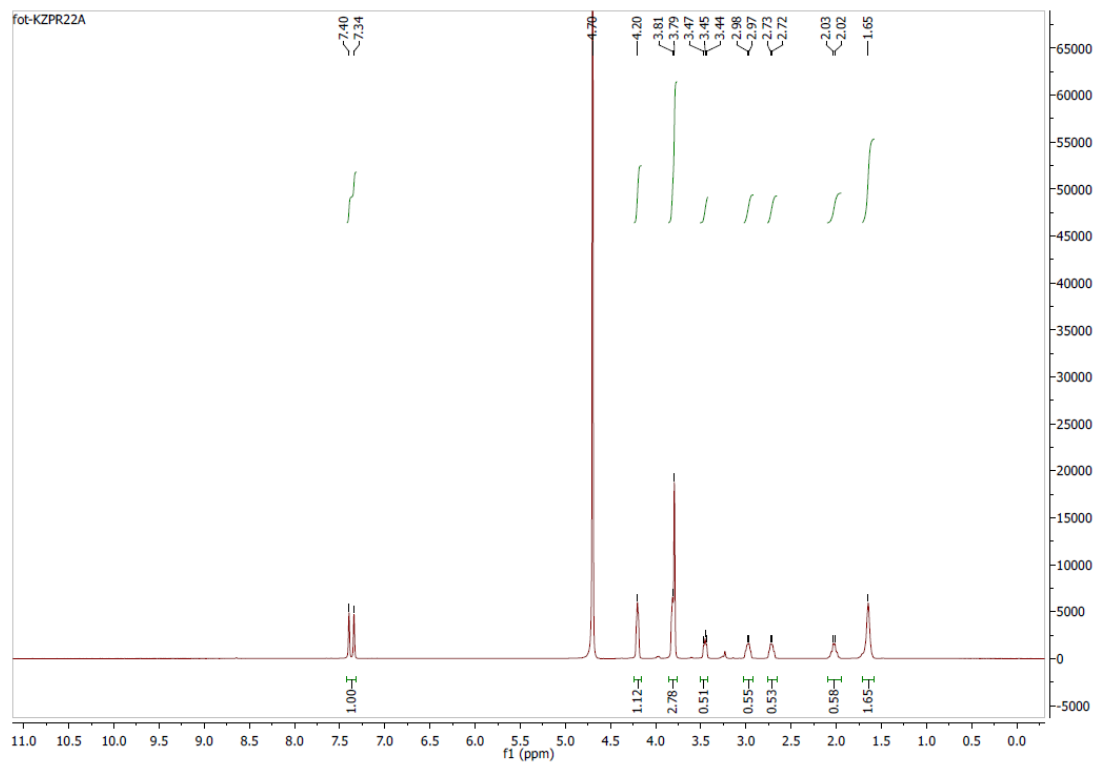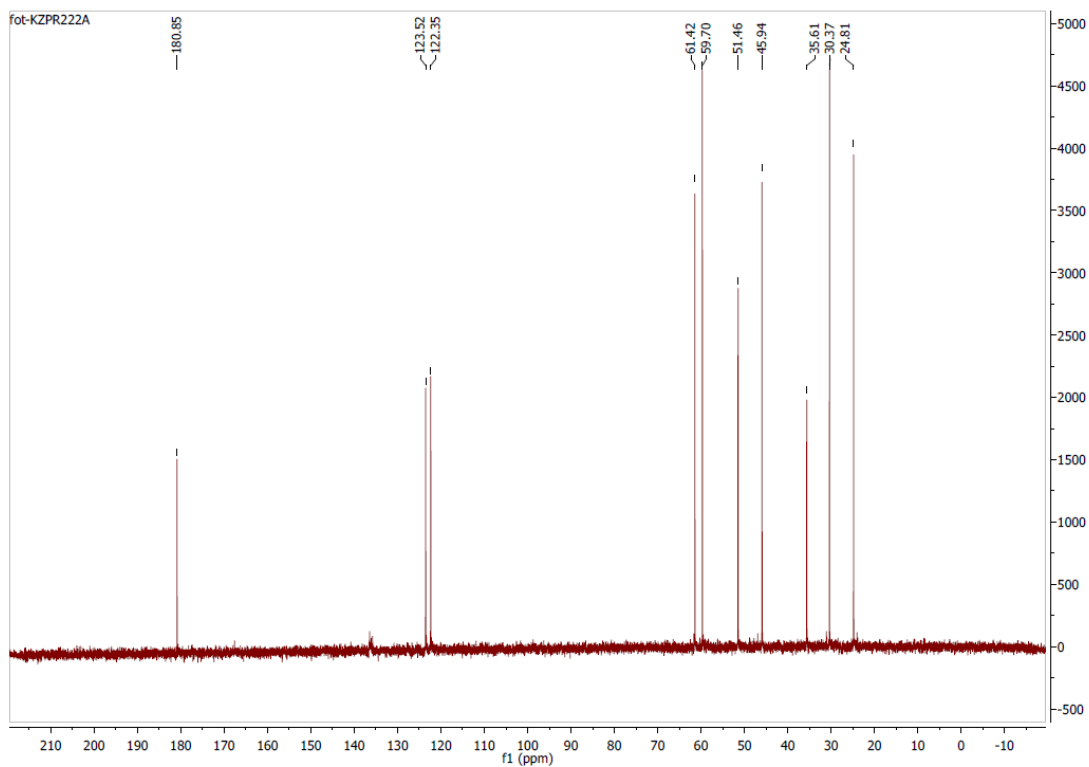

**1-(2-hydroxyethyl)-2,3-dimethyl-1H-imidazol-3-ium (L)-pyrrolidine-2-carboxylate (2e) [C<sub>2</sub>OHDMIM][ProCO<sub>2</sub>]**

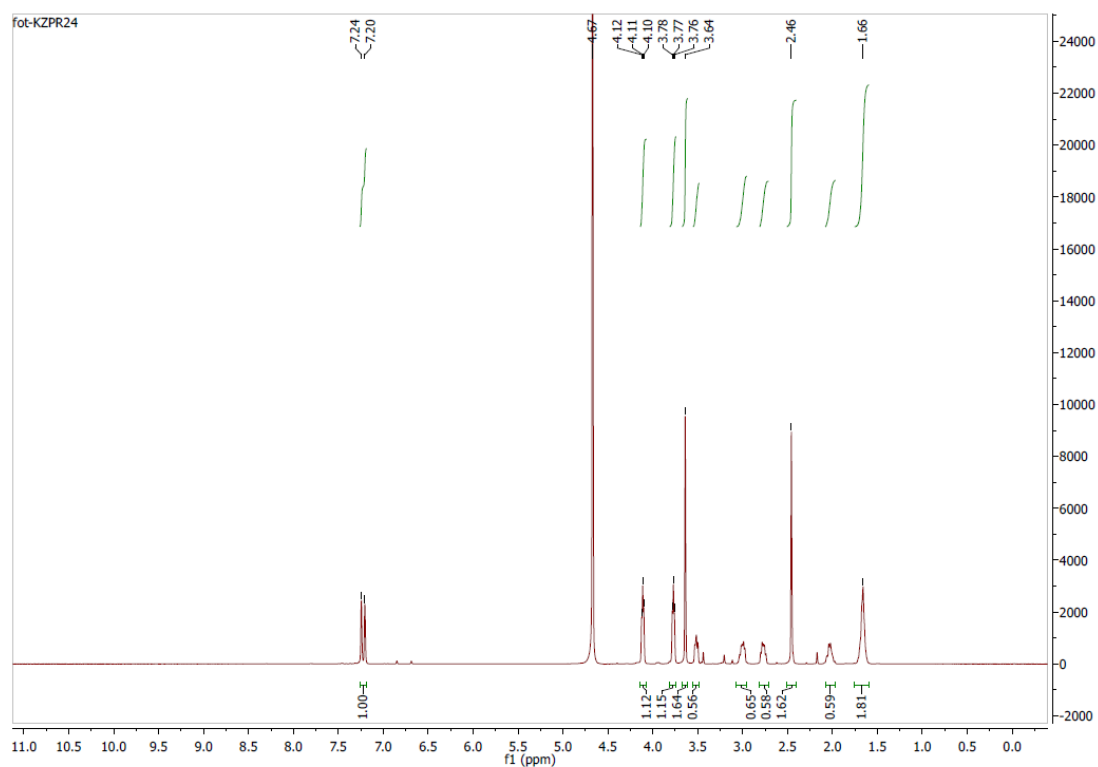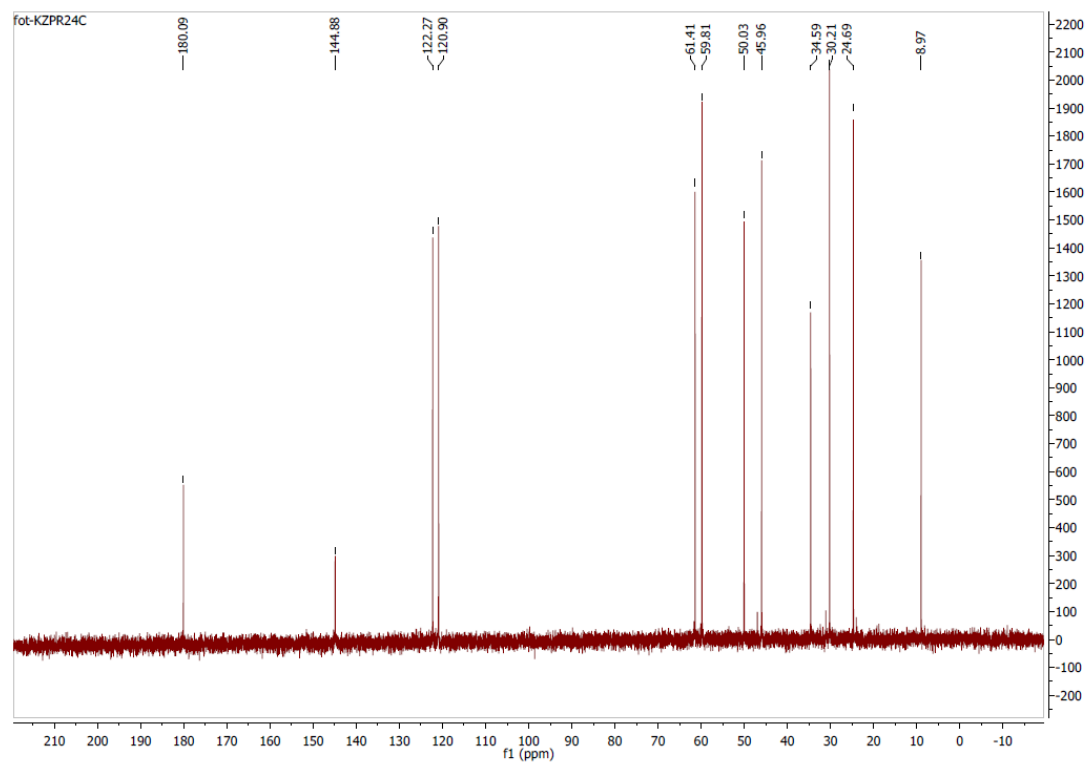

**2-hydroxy-N,N,N-trimethylethanaminium (L)-pyrrolidine-2-carboxylate (2f)**

# [Choline][ProCO<sub>2</sub>]

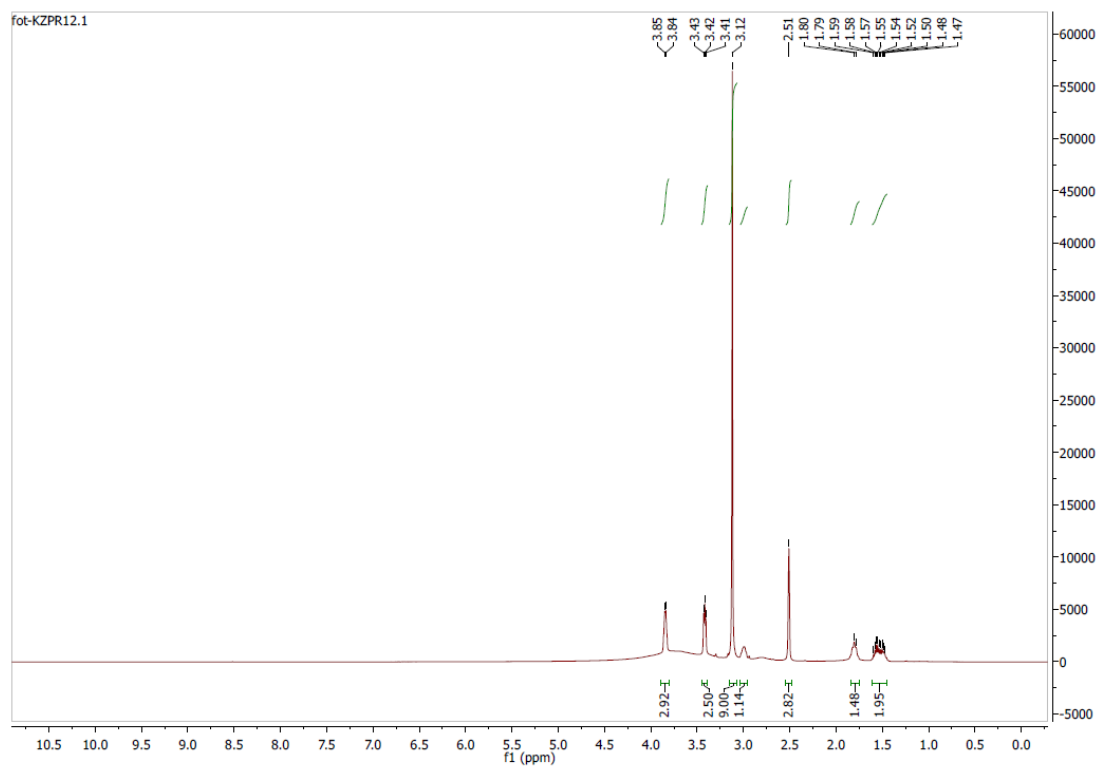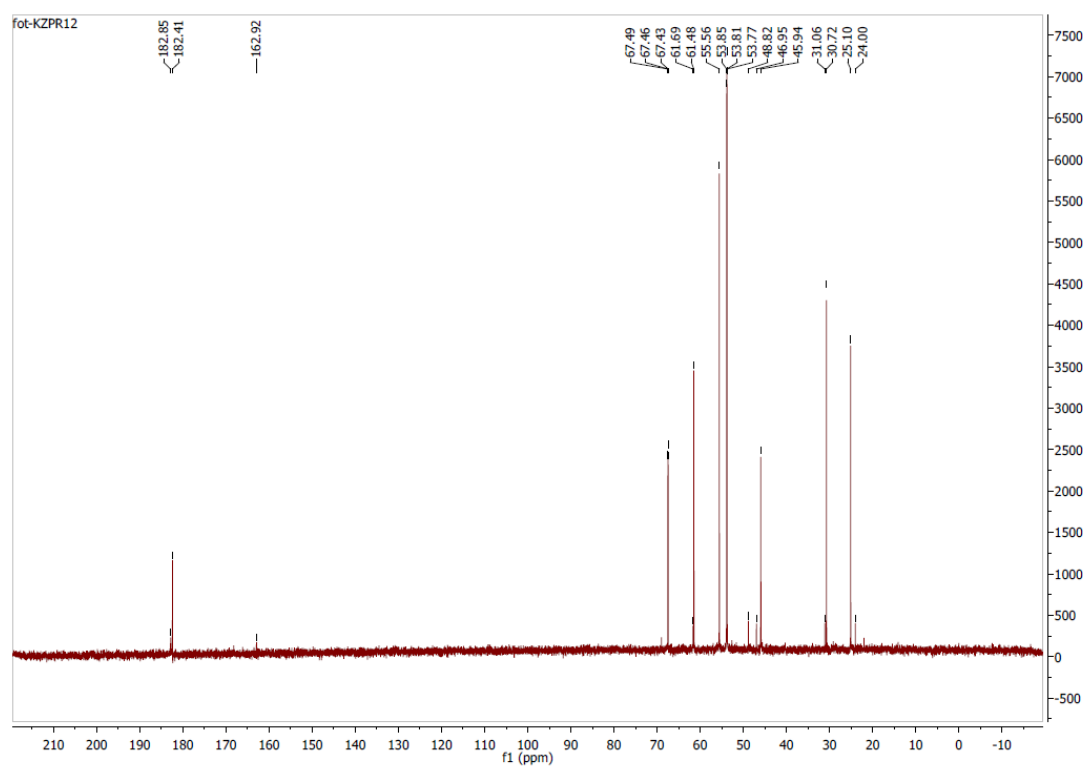

**(L)-2-(D)-2-nitro-1-phenylethyl)cyclohexanone:**

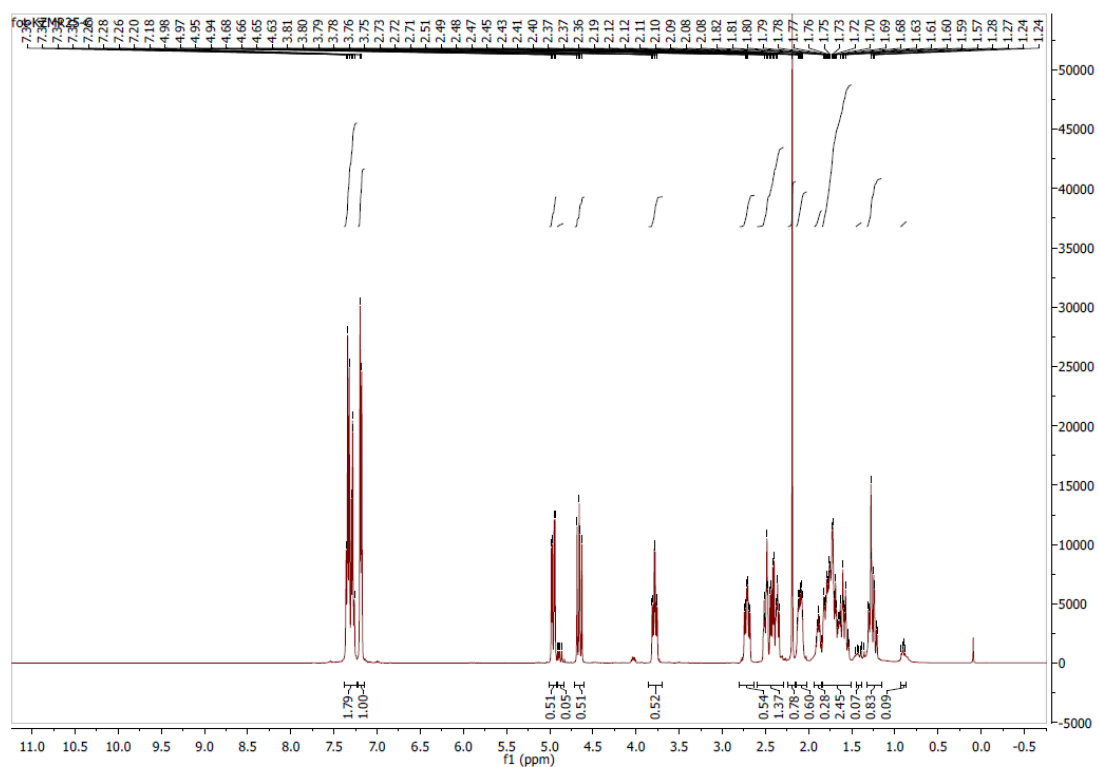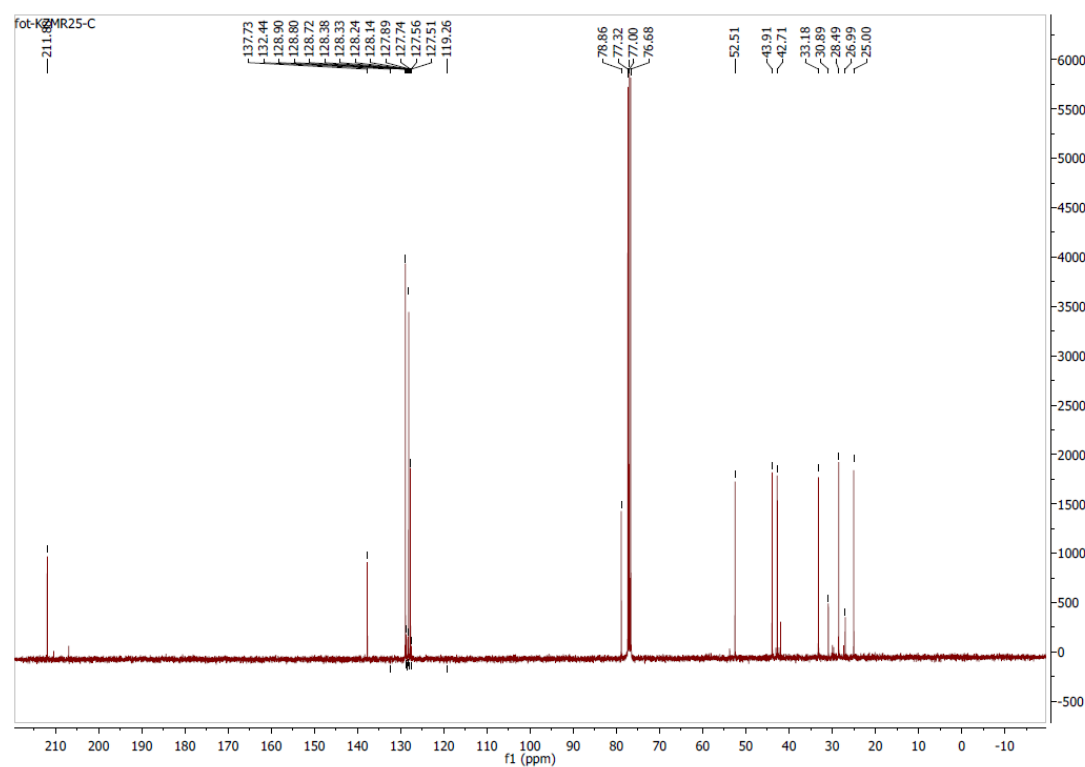

**(R)-5-nitro-4-phenylpentan-2-one:**

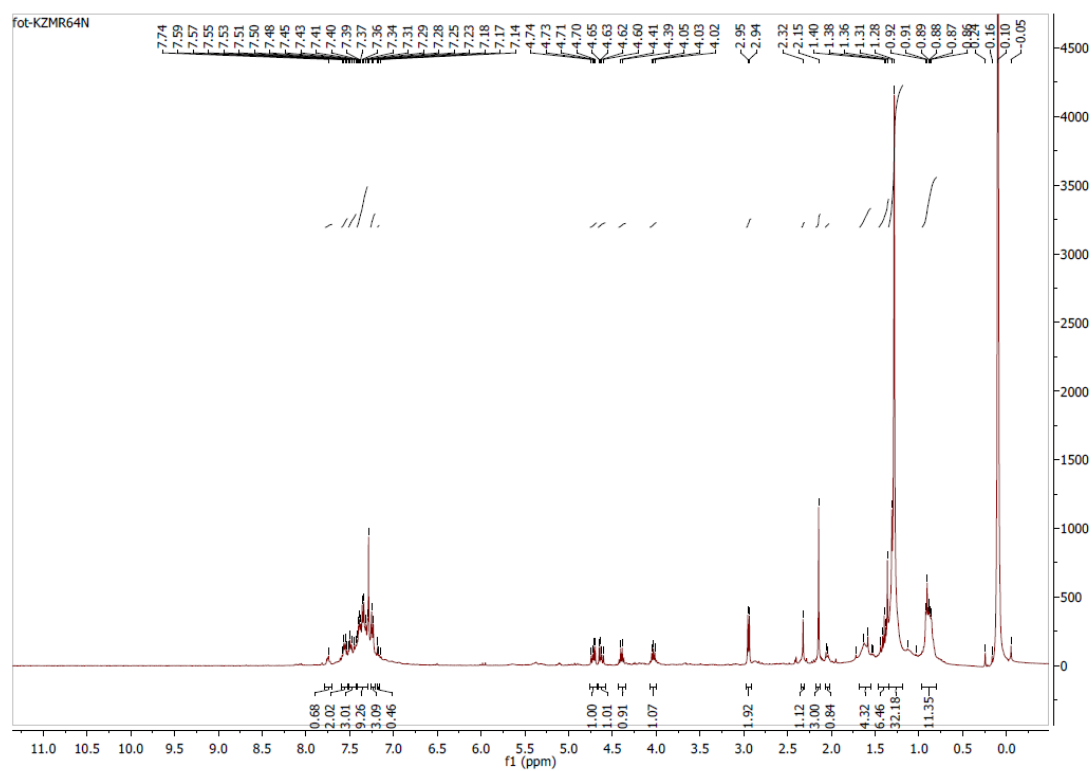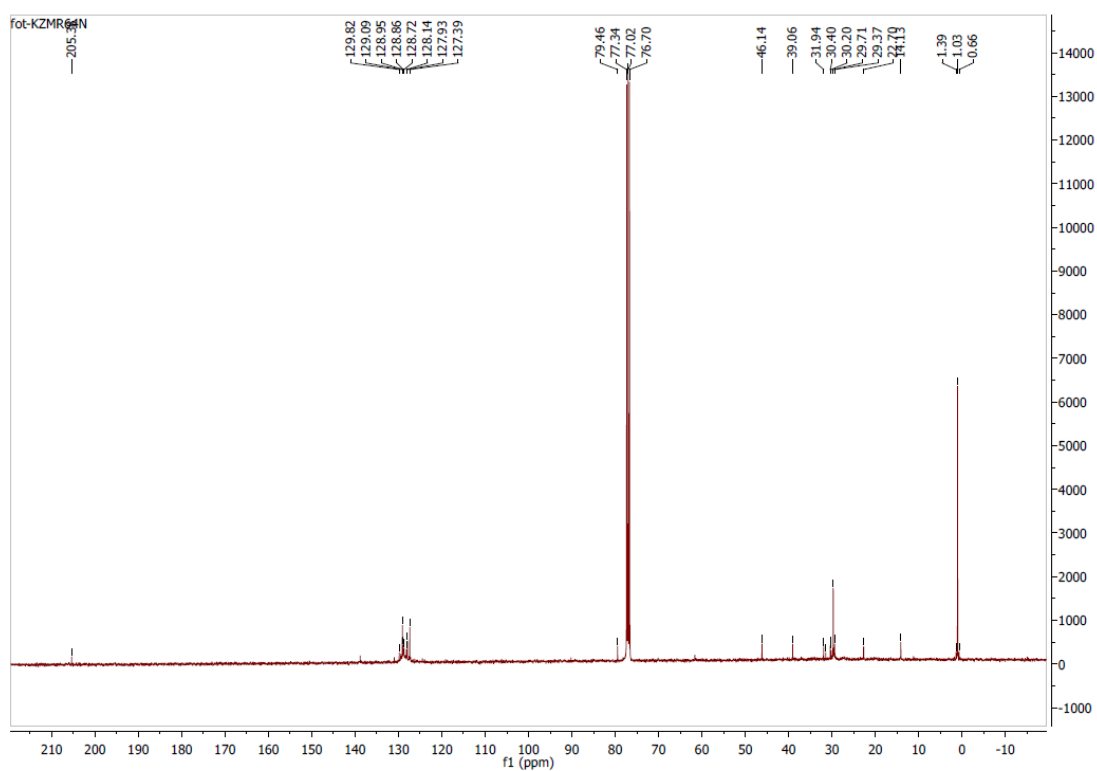



**(R)-2-((S)-1-(4-fluorophenyl)-2-nitroethyl)cyclohexanone:**

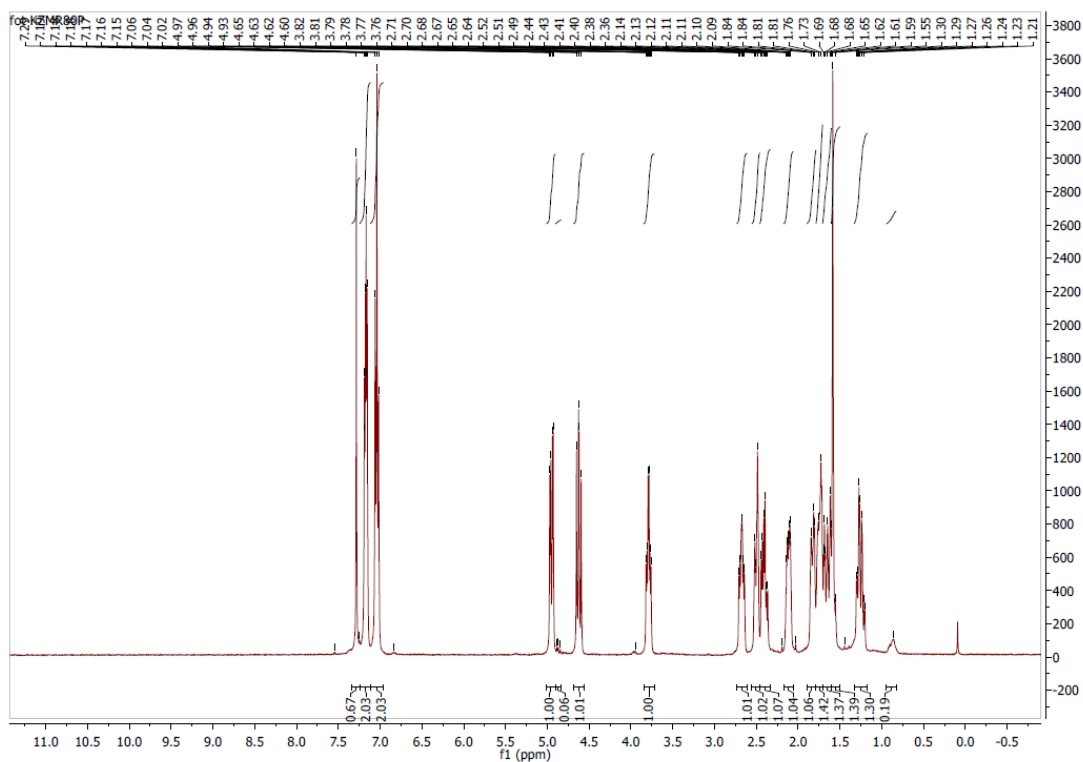

**(S)-4-(4-fluorophenyl)-5-nitropentan-2-one:**

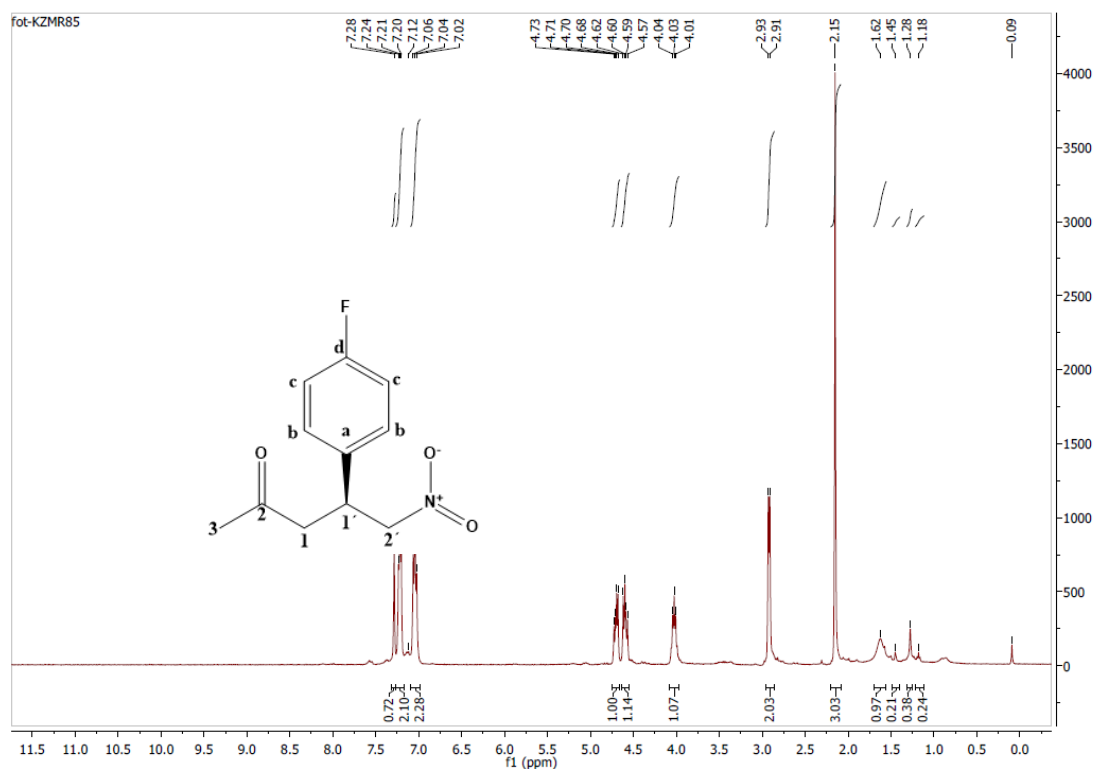

**2-((R)-1-(3-chlorophenyl)-2-nitroethyl)cyclohexanone:**

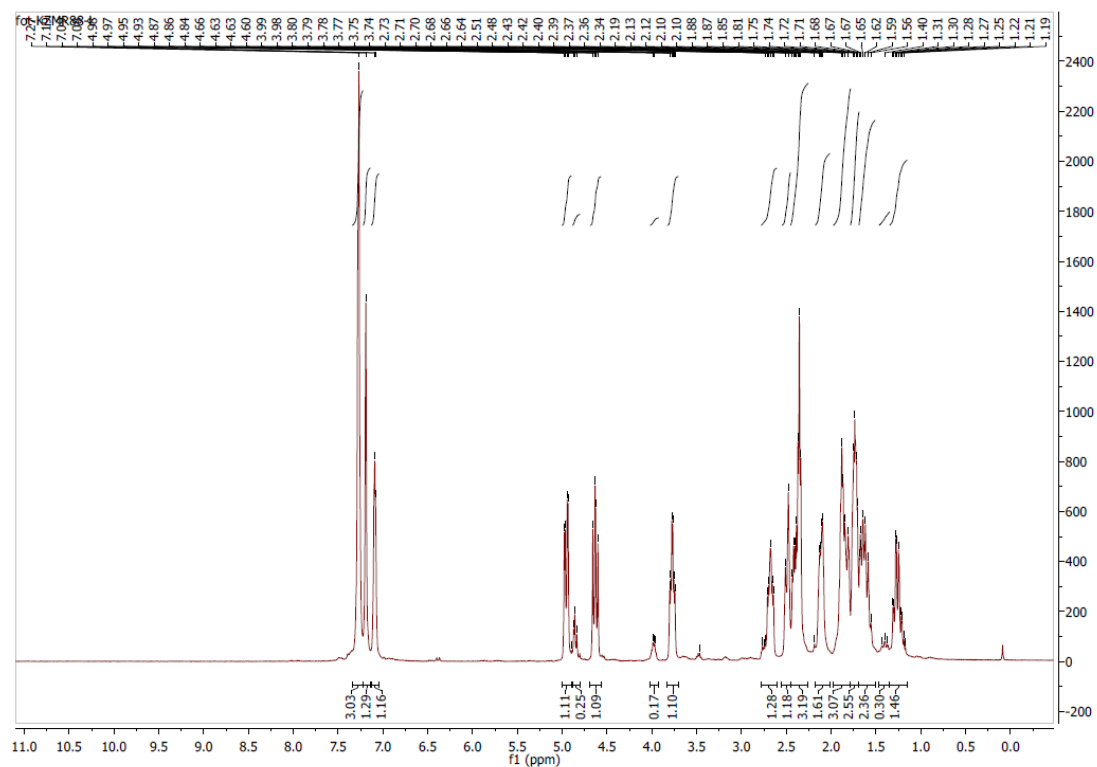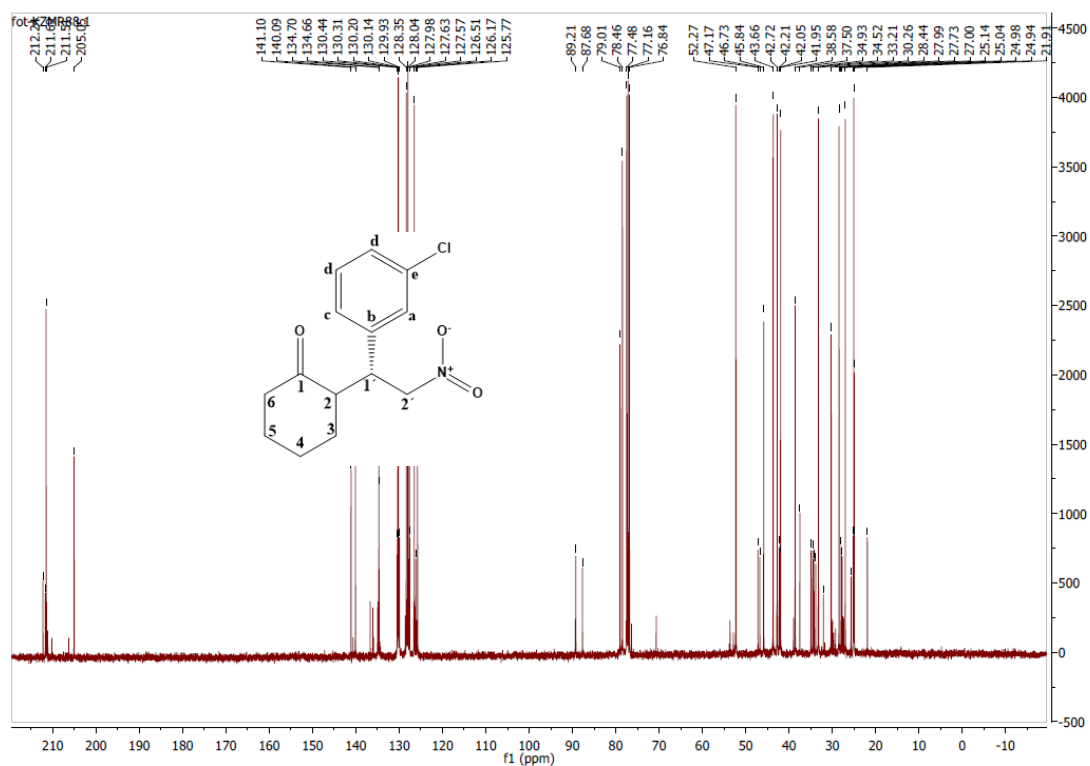

**(R)-4-(3-chlorophenyl)-5-nitropentan-2-one:**

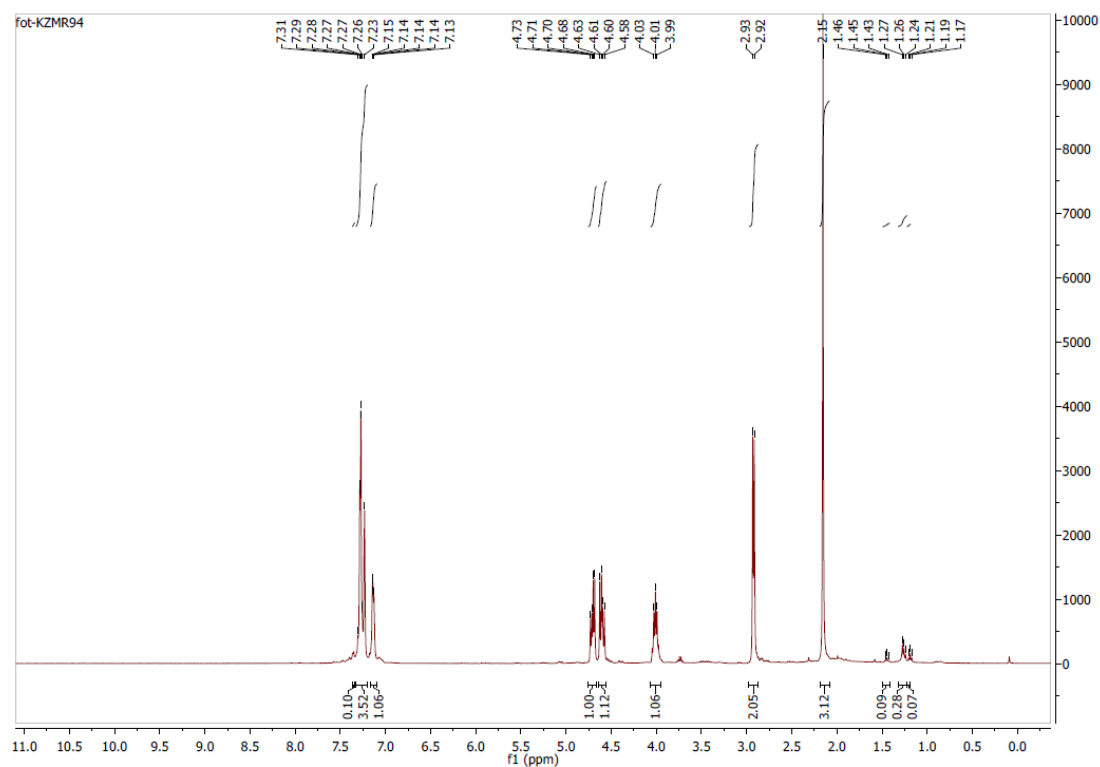

**General scheme of the extraction of chiral Michael product using scCO<sub>2</sub>.**

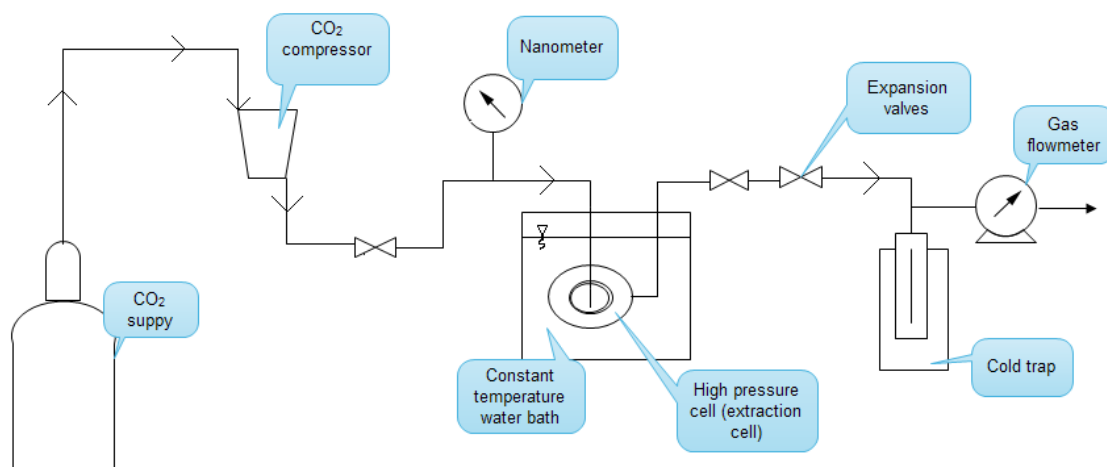

**Chromatograms.**

**Product A, catalyst: L-proline in [Emim][EtSO<sub>4</sub>], ee=87%**

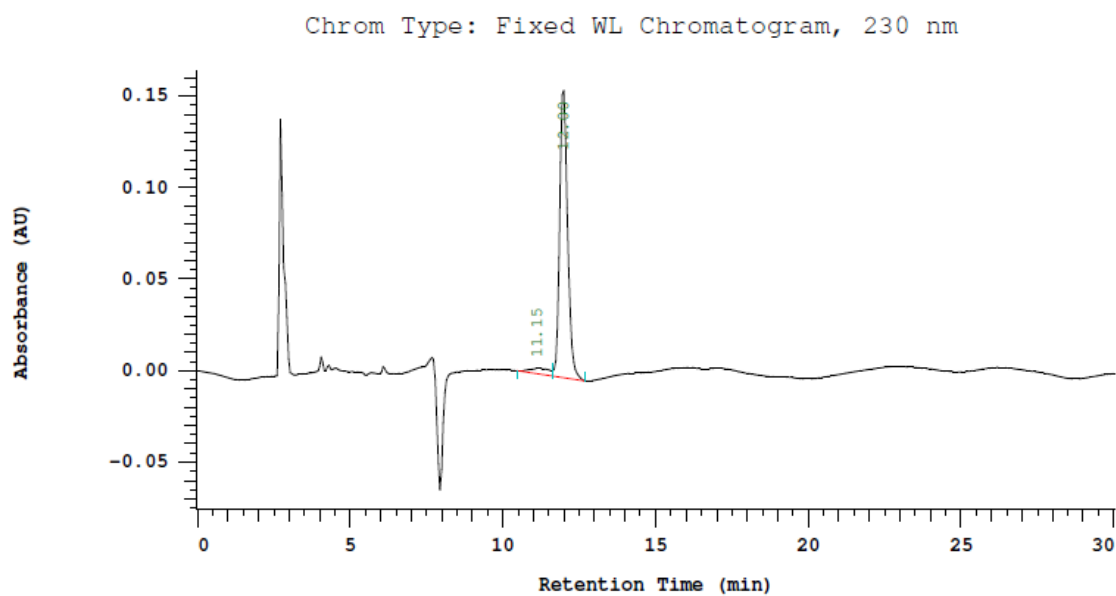

| Peak | Retention Time (min) | Area (230 nm) |
|------|----------------------|---------------|
| 1    | 11.15                | 71485         |
| 2    | 12.00                | 1423794       |

**Product A, catalyst: [Na][ProCO<sub>2</sub>] in EtOH, ee=40%**

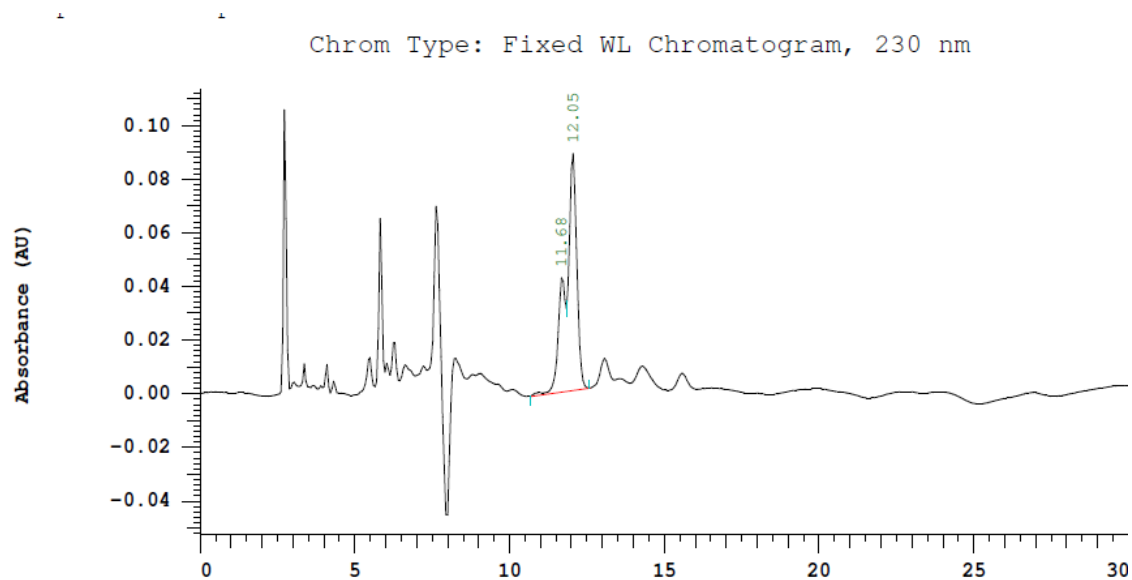

| Peak | Retention Time (min) | Area (230 nm) |
|------|----------------------|---------------|
| 1    | 11.68                | 335057        |
| 2    | 12.05                | 785582        |

**Product A, catalyst: [Choline][ProCO<sub>2</sub>] in [Bmim][DCA], ee=97%**

Chrom Type: Fixed WL Chromatogram, 230 nm

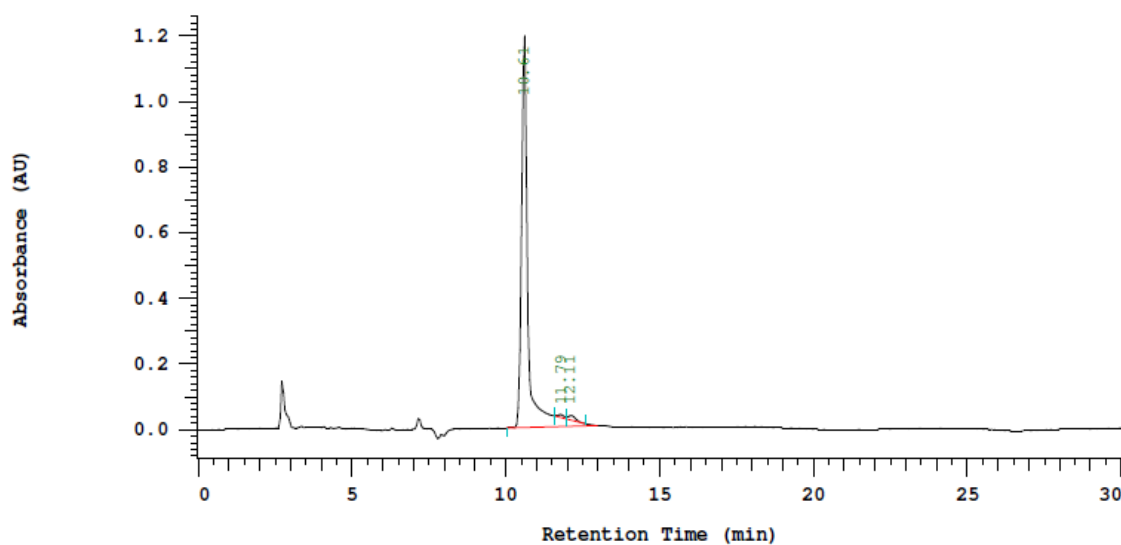

| Peak | Retention Time (min) | Area (230 nm) |
|------|----------------------|---------------|
| 1    | 10.61                | 8867800       |
| 2    | 12.11                | 193519        |

**Product B, catalyst: L-proline in EtOH, ee=47%**

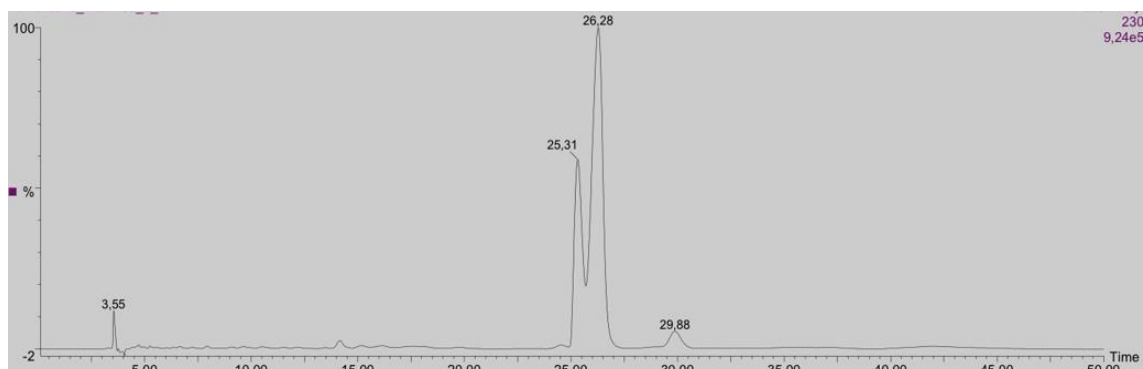

| Peak | Retention Time (min) | Area (230 nm) |
|------|----------------------|---------------|
| 1    | 28.16                | 51720         |
| 2    | 29.16                | 144723        |

**Product C, catalyst: [Choline][ProCO<sub>2</sub>] in EtOH, ee=86%**

Lux 5u Cellulose 250-4.6 Chiral Column  
12-11-2016\_KZMR100\_4

Diode Array  
TIC  
1,74e7

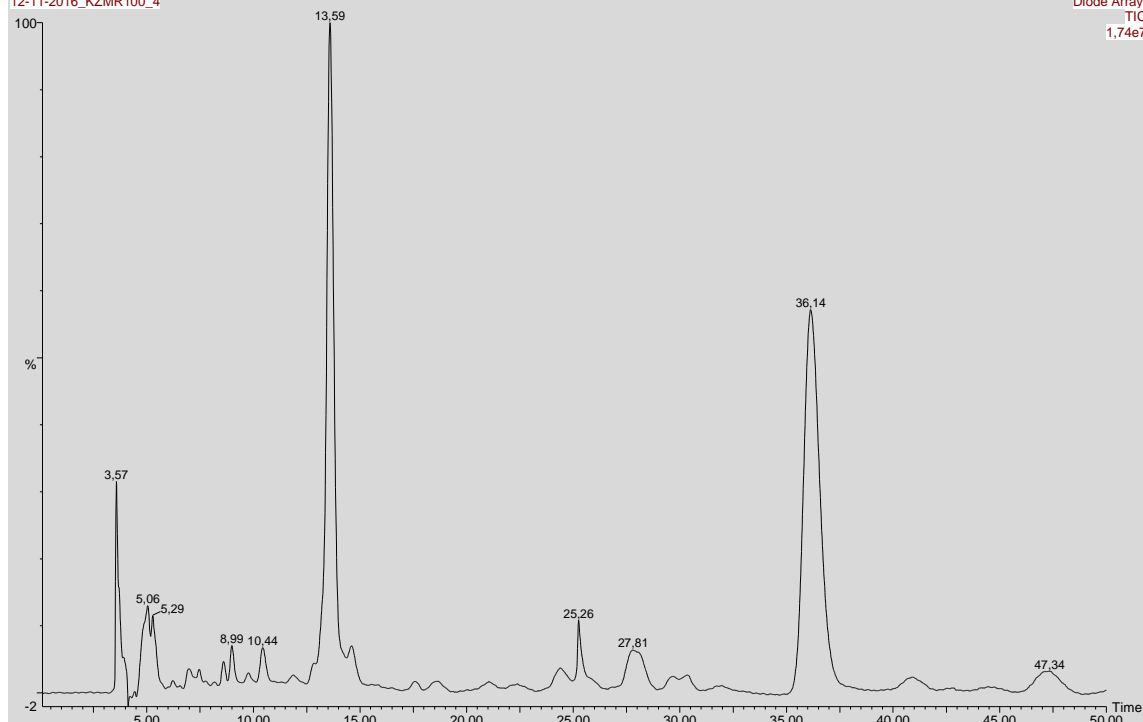

| Peak | Retention Time (min) | Area (230 nm) |
|------|----------------------|---------------|
| 1    | 13.61                | 116289        |
| 2    | 14.56                | 8486          |

**Product D, catalyst: L-proline in EtOH, ee=10%**

Lux 5u Cellulose 250-4.6 Chiral Column

08-07-2016\_KZMR85\_1

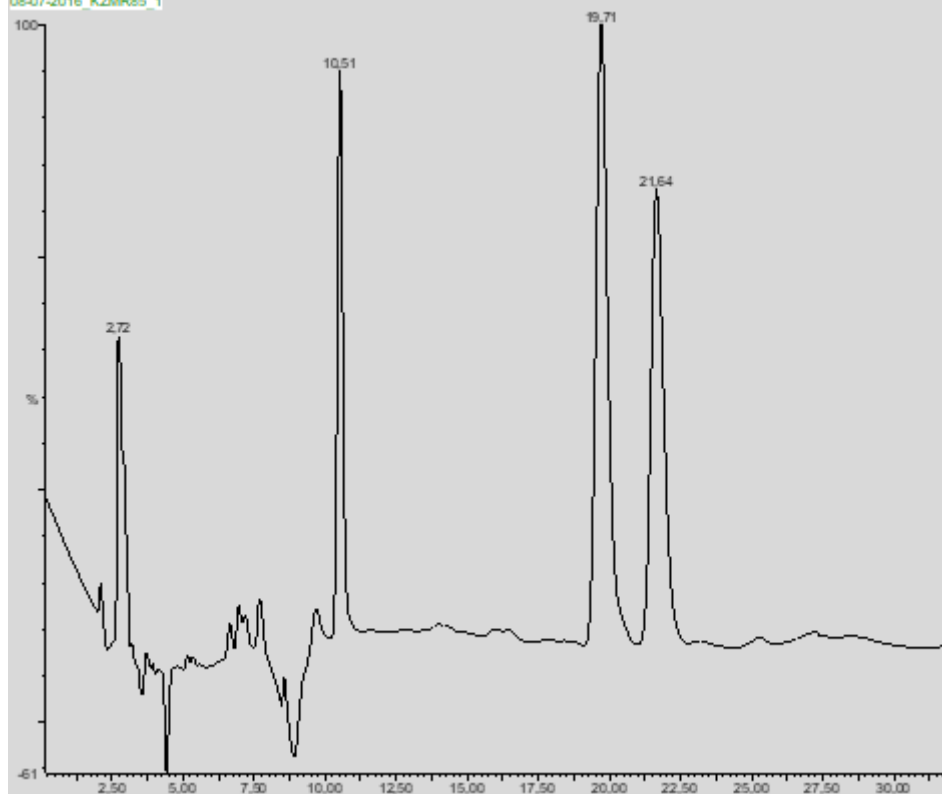

| Peak | Retention Time (min) | Area (230 nm) |
|------|----------------------|---------------|
| 1    | 19.71                | 101933        |
| 2    | 21.64                | 83802         |

**Product E, catalyst: L-proline in EtOH, ee=40%**

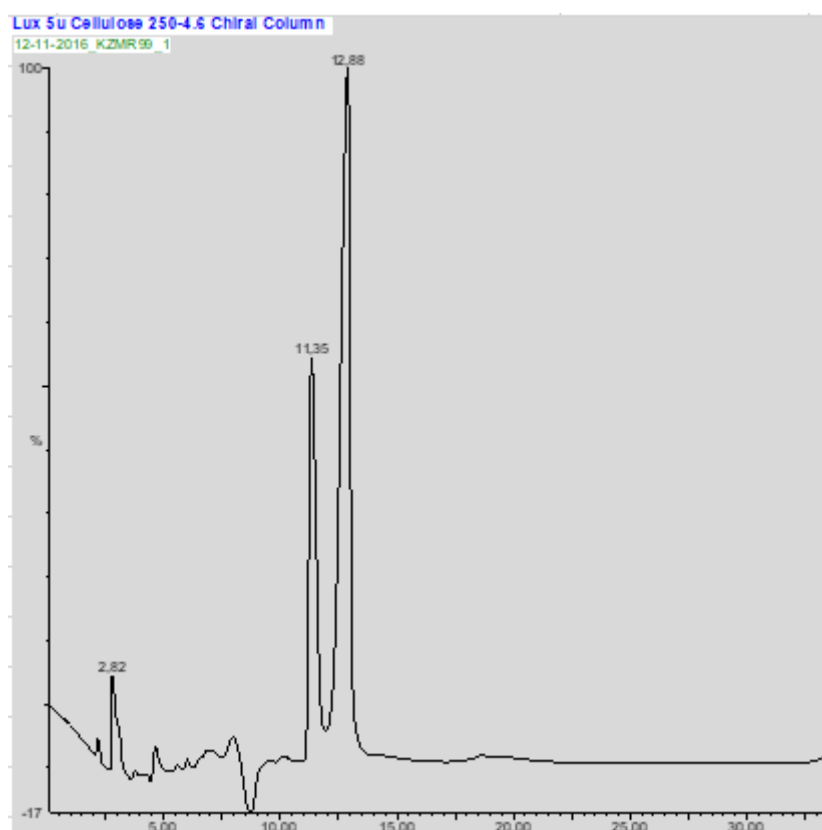

| Peak | Retention Time (min) | Area (230 nm) |
|------|----------------------|---------------|
| 1    | 11.35                | 330117        |
| 2    | 12.87                | 776588        |

**Product F, catalyst: L-proline in EtOH, ee=100%**



Lux 5u Cellulose 250-4.6 Chiral Column

14-09-2016\_KZMR95\_3

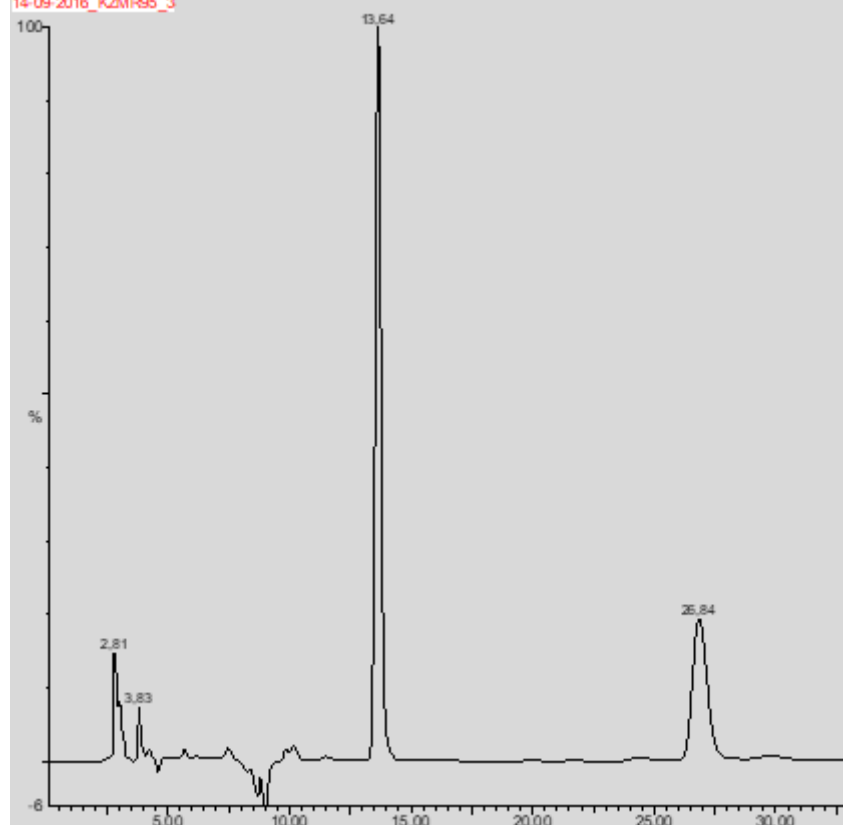

| Peak | Retention Time (min) | Area (230 nm) |
|------|----------------------|---------------|
| 1    | 13.64                | 315132        |
| 2    | --                   | --            |
